# Supplementary material for: Complete Khoisan and Bantu genomes from southern Africa
Source: Springer Nature journal article supplement (doi:10.1038/nature08795), 2010-02-01
Supplement: 41586_2010_BFnature08795_MOESM278_ESM.pdf [file 41586_2010_BFnature08795_MOESM278_ESM.pdf]

## SUPPLEMENTARY INFORMATION

**Supplementary Discussion****Population naming**

In some contexts, the indigenous hunter-gatherer and pastoralist peoples of southern Africa are referred to collectively as the Khoisan (Khoi-San) or more recently Khoesan (Khoe-San) people. This grouping is based on the unique linguistic use of click-consonants<sup>1</sup>. Many names, often country-specific, have been used by Bantu pastoralists and European settlers to describe the hunter-gatherers, including San, Saan, Sonqua, Soaqua, Souqua, Sanqua, Kwankhala, Basarwa, Batwa, Abathwa, Baroa, Bushmen, Bossiesmans, Bosjemans, or Bosquimanos. In addition, group-specific names such as !Kung and Khwe are often used for the broader population. The two most commonly used names, “San” and “Bushman”, have both been associated with much controversy due to derogatory connotations<sup>2</sup>. “San” has become the more popular term used in Western literature, although “Bushman” is arguably the more commonly recognized term within the communities. Since they have no collective name for themselves, the term Bushmen was selected for use in this paper as the term most familiar to the participants themselves.

**Regarding identification of individuals**

The five men identified in this study have all elected to have their identity made public knowledge. Thus we present two complete personal genomes (KB1 and ABT), a low-coverage personal genome (NB1), and personal exomes for all five men. On a scientific level, identification allows for current and future correlation of genetic data with demographic and medical histories. On a social level, identification allows for maximizing community benefit. For !Gubi, G/aq'o, D#kgao and !Aî, their name represents not only themselves, but importantly their extended family unit and a way of life severely under threat. For Archbishop Desmond Tutu, his international status will have an immediate impact on providing a voice for southern Africa in pharmaceutical developments based on genomic data.

**Ethics approval**

Ethics approval to conduct whole-genome sequencing and/or extended genetic diversity studies was obtained from the Institutional Review Board (IRB) or Human Research Ethics Committee (HREC) from three institutions, namely the Pennsylvania State University (IRB #28460 and IRB #28890), the University of New South Wales, Australia (HREC #08089 and HREC #08244), and the University of Limpopo, South Africa (Limpopo Provincial Government #011/2008). All authors directly involved with the study participants and/or data generated are named on one or more approvals. A study permit was obtained from the Ministry of Health and Social Services (MoHSS), Namibia. In addition to the named institutions, an external advisory panel of South African academic and medical professionals was established on the recommendation of Archbishop Tutu. Informed consent was obtained either via written or video-recorded (in cases of illiteracy) documentation. For the Bushmen, consent was performed in three languages and in the presence of a caretaker and translator. All participants undergoing genome sequencing elected to be named in the study. Study participants underwent extensive face-to-face interviews and have been fully advised about the outcomes of the research. During the site visits, there was no change in the desire to participate in this study. All participants provided venous whole blood, and DNA was extracted using standard extraction procedures (Qiagen Inc., Hilden, Germany).

### Participant selection

The southern African Bushmen have been proposed to show increased within-group Y-chromosome diversity and limited overall mtDNA diversity<sup>3</sup>. Therefore, we examined males exclusively, to increase the amount of detectable variation. Each of the four participating indigenous hunter-gatherer individuals is the eldest member of his community. Additional criteria for inclusion in the study were based on linguistic group, geographical location, and the presence of previously described population-specific non-recombining Y-chromosome (NRY) markers<sup>4</sup> (Figure 1, Supplementary Table 1).

A total of 20 Bushmen were genotyped via amplicon-specific Sanger sequencing for 13 Y chromosome markers<sup>5</sup> (M2, M9, M14, M35, M51, M90, M98, M112, M115, M150, M154, M175, and M211). The group consisted of 19 Juu-speakers (13 Ju/'hoansi, four Etosha !Kung, two Vasekela !Kung), and a single Tuu-speaker. "Vasekela" is a local term for a group relocated from Angola to the northern Kalahari region of Namibia after serving in the South African Defense Force during the Namibian-Angolan war. Several candidates were excluded because of their non-African (K-R) and Asian/Indonesian haplogroups (O); two were excluded because of a Bantu-dominant E1b1a (previously known as E3a) haplotype.

The indigenous Kalahari Juu- and Tuu-speaking hunter-gatherers included in this study live in scattered family groups in the vast semi-desert regions of Namibia, an 823,145-km<sup>2</sup> country on the southwest coast of Africa with approximately 2 million inhabitants. Namibia is home to around 38,000 Bushmen<sup>6</sup>. KB1, !Gubi, is the only member of the study belonging to the poorly defined Tuu-speaking group of the southern Kalahari. NB1, G/aq'o, and TK1, D#kgao, are both Ju/'hoansi of the northern Kalahari region, separated by approximately 120 km. MD8, !Aî, belongs to the !Kung-speaking group relocated some 50 years ago from the Etosha plains region in the northwestern Kalahari. The Ju/'hoansi and !Kung are grouped linguistically as Juu-speakers. The four Bushmen participants represent Y haplogroups A2 (TK1), A3b1 (NB1), B2b (KB1), and E1b1b1 (MD8).

Archbishop Desmond Tutu (ABT) is directly descended from the two major linguistic groups in southern Africa, namely the Nguni-speakers (approximately 60% of the people of South Africa) via his paternal Xhosa ancestry and from the Sotho-Tswana-speakers (approximately 33% of the people of South Africa) via his maternal Motswana ancestry. These two linguistic groups therefore represent over 90% of the South African Bantu population, who have lived along-side the indigenous hunter-gatherer and herder peoples (Khoesan) for over 2,000 years. Archbishop Tutu is thus an ideal representative of the southern African Bantu peoples. Using genome-wide genotypes and whole-genome sequence data, ABT was classified in the E1b1a8a Y-haplogroup.

### Genome-wide heterozygosity and potential admixture

Evaluation of population admixture within our study's four Bushmen required a genotypic analysis of a southern African Bantu population. For this study, we elected to use data previously generated for the Xhosa (XHO), the paternal lineage of Archbishop Tutu. Linguistically, the Xhosa have adopted "click" consonants within their language, suggesting an extensive period of cohabitation with the indigenous hunter-gatherers.

Since one indicator of admixture is an elevated rate of heterozygosity, we used genome-wide genotyping data (from Illumina 1M Human Duo arrays) to determine the overall percentage

of heterozygosity in our five participants, plus a South African European (SAE) and an admixed South African Coloured (SAC) (Supplementary Figure 3A). The SAC community arose as a consequence of slavery and a subsequent genetic mixing of East African, East Indian, and Indonesian elements, starting with European settlement at the Cape in 1652. In a previous study we identified a European (predominantly via paternal lines) and southern African Bantu or East Asian (via maternal lines) admixture in this community, with negligible Bushmen contribution<sup>7</sup>.

Increased overall percentage heterozygosity in MD8 compared to KB1, NB1, and TK1 may indicate a degree of admixture. However, we were surprised that the heterozygosity determined by this method was on average low in the Bushmen, particularly since our sequence data indicate otherwise. The observed low heterozygosity suggests one (or more likely a combination of) the following scenarios: (1) population isolation, (2) reduced admixture events, and (3) reduced informativeness of this particular SNP array for Bushmen. The observed low percentage heterozygosity in ABT compared to SAE and SAC populations also may be an artifact of using a European-biased array.

Autosome-specific analysis of heterozygosity (Supplementary Figure 3B) demonstrated sample-specific hotspots, for example the increased percentage heterozygosity observed in chromosome 5 for KB1 and the reduced heterozygosity observed in chromosome 18 for TK1, compared to the other Bushmen.

### **Impact of traditional life-style on gender-biased gene flow**

The reported limited male-mediated gene flow<sup>8</sup> in southern African Bantu populations<sup>9</sup> has resulted in a predominance of the E1b1a (M2) Y-chromosome haplogroup across the region. Lack of Y-chromosome divergence has been attributed to cultural practices of patrilocality (location of family with that of the male) and polygyny (multiple wives), resulting in a lower male migration rate and lower male effective size, respectively<sup>10</sup>. In contrast to their Bantu neighbors, the indigenous hunter-gatherers practice a culture of matrilocality and monogyny; thus we can assume a male-biased migration rate resulting in greater Y-chromosome over mtDNA diversity.

Traditionally, due to a nomadic lifestyle, the hunter-gatherer people do not own possessions. This lack of ownership results in Bushmen men being ineligible to marry a Bantu woman, because they cannot pay the father-in-law a “lobola” (also known as lobolo or mahadi), a payment usually made in cattle for her hand in marriage. Male-contributed Bushmen-Bantu admixture is therefore assumed to be minimal to absent. Bantu men marrying hunter-gatherer women is however reported to have been quite common. A feeling of inferiority associated with the “Bushmen” or “San” ethnic classification meant that many Bushmen women tried to uplift their status via marriage to Bantu men. We therefore speculate the strong possibility of Bushmen contributions to the mitochondrial genome and X-chromosome in southern African Bantu populations.

### **Insertions, deletions, microsatellites, and Alu elements**

We identified 463,788 putative short indels (i.e., insertions/deletions; the longest was 38 bp) in the KB1 genome, of which 172,589 (37.2%) are homozygous. A special class consists of small indels created by expansion or contraction of a microsatellite, here taken to mean a tandem duplication of a core sequence of between 2 and 6 nucleotides. We identified 102,476 high-confidence microsatellites, each having no differences among its tandem copies and separated by sharp boundaries from the flanking non-repetitive DNA. For 16.0% of these, the number of

copies of the core sequence appeared to differ from the orthologous repeats in the hg19 (a human reference genome that superseded the one used for most of our analyses), Venter, and/or Watson genomes. We also inspected KB1's exome to determine his genotype at unstable microsatellites in which mutations (usually expansions) have been documented or suggested to lead to disease<sup>11</sup>. At several such loci (Supplementary Table 15), alleles in KB1 possessed a number of repeats that was close to the minimum value in the normal range, suggesting that longer, disease-causing alleles were likely acquired by the non-Bushmen lineage later in its evolution.

The length distribution of longer indels (say, at least 50 bp relative to the human reference) in KB1 shows the expected enrichment at a length of around 300 bp caused by Alu interspersed-repeat elements, which are known to be polymorphic in the human population. We identified 503 Alu insertions in the human reference relative to the KB1 genome, with 44.1% belonging to the AluYa5 subfamily. Of these 503, we found 24 common to Watson, Venter, and the human reference, but absent in chimp, KB1 and NB1. Those Alu elements may have been inserted into the ancestor of non-Bushmen genomes after their divergence from the Bushmen lineage.

A portion (9.7%) of our Roche/454, non-paired reads do not map to the human reference genome at the thresholds we used (97% identity over at least 90% of the read). It has been reported<sup>12,13</sup> that the Roche instrument is capable of sequencing regions that are recalcitrant to the BAC-based approach used to sequence the reference. Indeed, a number of the unmapped reads align to regions of the chimpanzee genome that appear to be orthologous to human regions corresponding to gaps in the current human reference assembly. For instance a 200-kb gap in NCBI Build 36 at chromosome 6q16.1 corresponds to a chimpanzee interval where our unmapped reads produce 7.1X average read depth and assemble into 129 contigs of total length 253,769 bp. In other cases, we find assemblies of KB1 reads that contain exons apparently deleted from the reference assembly, e.g., parts of the GenBank mRNA sequences AK096045 and AK128592.

### **Genotype and phenotype correlations: lactase persistence**

Lactase persistence (the ability to digest milk as adults) is an autosomal-dominant trait that is common in European-derived populations. This evolutionary adaptation has been associated with a SNP in intron 13 of the *MCM6* gene on chromosome 2, upstream of the gene encoding for lactase (*LCT*). This regulatory SNP, known as -13910 C>T (rs4988235), has been shown to increase *LCT* transcription in vitro by generating an Oct-1 transcription-factor binding site (reviewed in ref. 14). However, in contrast to Europe, the frequency of this allele in sub-Saharan Africa is rare, and it has not been found in the remains of Neolithic Europeans. These studies suggest that lactase persistence is an evolutionary innovation that has undergone strong population-specific positive selection following human conversion (via either a population replacement or cultural exchange) from forager to farmer. As expected for a foraging society, we found the Bushmen in our study all to be homozygous for the C-allele, suggesting an inability to tolerate milk consumption as adults.

### **Human pigmentation**

A functional SNP that has undergone genetic selection in Europeans resulting in near fixation is the non-synonymous rs1426654 G>A (Ala111Thr) variant in the human pigmentation gene *SLC24A5*. The A-allele has undergone positive selection in the last 100,000 years, contributing to the pale skin color of Europeans. The color of the human skin is largely determined by the

amount and type of melanin pigment produced in the cutaneous melanocytes, which in turn impacts susceptibility to skin cancer, a condition mostly affecting people of pale complexion. The *SLC24A5* genotype observed in the sequence data was validated using TaqMan allelic discrimination for our sequenced men and additional individuals, demonstrating a predominance of the melanin-producing G-allele in the lighter-skinned Bushmen (allele frequency 0.98, n=45), and darker-skinned southern African Bantus from the same region (allele frequency 0.90, n=31), while being uncommon in pale-skinned southern African Europeans (allele frequency 0.07, n=14). Retaining this allele would provide a selective advantage for survival in the harsh climate of the Kalahari Desert.

Human pigmentation, however, is a polygenic quantitative trait with high variability influenced by a number of candidate genes. A recent genome-wide association study (GWAS) of natural hair color (a marker for pigmentation) identified two key polymorphisms, one located in another potassium-dependent sodium/calcium exchanger gene *SLC24A4* (rs12896399 G>T)<sup>15</sup>. Significantly associated with light hair color, we found this allele to be absent in our sequenced men. These observations highlight the need for synergy between environment and phenotypic attributes, allowing for reproductive advantage and survival.

### Duffy null allele

The Duffy antigen/receptor for chemokines (*DARC*) gene on chromosome 1 harbors a functional polymorphism in the promoter region (T-46C; rs2814778) responsible for the observed decreased white blood cell count in African-Americans compared with European-Americans<sup>16,17</sup>. The consequence is critical for medical conditions where decreased white cell levels are associated with diseases involving inflammation and infection. This so-called Duffy Null polymorphism (also known as *FY+/-*) has been associated with an evolutionary advantage in African populations due to protection against *Plasmodium vivax* malaria infection<sup>18</sup>. More recently, an association with susceptibility to HIV-1 infection has been reported<sup>19</sup>. This functional variant therefore has critical health implications relevant to southern African populations. The C-allele in Africans and T-allele in Europeans have reached almost complete population fixation. It has been suggested that the C-allele may have arisen in Africa as a result of selective pressure from a more lethal ancestral form of *Plasmodium vivax*<sup>20</sup>. The Asian origin hypothesis of *Plasmodium vivax* may suggest that fixation in Africa took place after the introduction of agriculture<sup>21</sup>. The lack of the C-allele in our forager participants (unlike the Bantu farmers) supports this latter hypothesis. We can further speculate that lack of agricultural adaptation in this community may be responsible for the absence of this allele and question what impact forced adaptation from forager to farmer will have on this already dwindling population.

### CYP2G

KB1 and NB1 are homozygous for a SNP that retains the function of the *CYP2G* gene (Supplementary Table 6). While this gene encodes a cytochrome P450 monooxygenase involved in steroid metabolism in the olfactory mucosa of mice, it is not active in most humans because of a nucleotide substitution leading to premature termination of translation<sup>22</sup>. The Bushmen genomes encode an amino acid at this position rather than a stop codon, and thus are likely to produce an active enzyme (Supplementary Figure 8A). Indeed, their sequence is the same as the ancestral sequence at this position. This suggests that Bushmen retain the active gene, perhaps in response to selective pressure, but in other populations it has decreased in frequency (20% of Bantu<sup>22</sup>) or been lost (almost all non-African humans have inactive genes), presumably from

relaxation of selection.

Further analysis of this variant by Sanger sequencing confirmed genotype calls for KB1 and NB1, and identified homozygosity for this allele in 27% of our extended Bushmen group (8/30) and 7% of Bantus from the same region (2/29). All remaining samples, including 11 Europeans, were heterozygous for the active ancestral and inactive modern alleles. Distribution of alleles occurred in a 2:1 ratio in all cases (Supplementary Figure 8B). A likely explanation is that *CYP2G* is an unprocessed pseudogene formed by segmental duplication, which resulted in one copy becoming silenced by a degenerative mutation (the T-allele). The T-allele was the most common allele in all samples of European origin. Sequencing was confirmed in both directions.

### CYP2E1

CYP2E1 is the major ethanol-inducible cytochrome P450 enzyme that metabolizes and activates many toxicologically important compounds, including ethanol, to more reactive toxic products. In fact, induction of *CYP2E1* is one of the central pathways by which ethanol generates oxidative stress via the generation of reactive oxygen species (ROS) such as superoxide anion radicals and hydrogen peroxide, and in particular of powerful oxidants like 1-hydroxyethyl radicals in the presence of iron catalysts. Ethanol-induced oxidative stress plays a major role in the mechanisms by which ethanol produces liver injury. We have detected and validated a 140-kb duplication encompassing the *CYP2E1* gene in KB1 (Supplementary Figure 6A) and previously described<sup>23</sup>.

### Variants in genes for lipid metabolism

We were intrigued by the apparent over-abundance of differences from the human reference genome in genes related to lipid metabolism (Supplementary Table 6). The diet of the non-pastoralist Bushmen is low in fats, and thus they may possess genetic variants associated with aspects of lipid metabolism not observed in other, pastoralist populations. We found that KB1, NB1, and ABT are heterozygous for a variant in the *LIPA* gene, which encodes lysosomal acid lipase, an enzyme that catalyzes hydrolysis of cholesterol esters and triglycerides. Mutations in *LIPA* that drastically reduce enzymatic activity lead to accumulation of cholesterol esters and triglycerides in the visceral organs, manifesting as a range of disorders including Wolman disease, a severe condition with onset in infants, and the milder cholesterol ester storage disease<sup>24</sup>. The G to A transition (C to T in chromosomal order; Supplementary Table 6) in the first position of codon 23 of *LIPA* causes a replacement of glycine by arginine in the signal peptide (Supplementary Figure 7). This transition was previously observed in a homozygous compound mutation in a Wolman disease proband<sup>25</sup>. While one of the sequence changes abolished enzymatic activity, the glycine to arginine replacement in the signal peptide had no effect on lipase activity. Instead, it substantially reduced the amount of enzyme secreted from cells. The fact that this allele is present in a heterozygous state in KB1, NB1, and ABT suggests that it is common in this population; previous studies estimated its frequency in healthy control individuals at only 0.05<sup>26</sup>. Thus while one may expect the arginine form of the enzyme to have reduced secretion, it may not be a problem and in fact could even provide some advantage, as many other mammals have an A at this position (Supplementary Figure 7).

A further complication to the interpretation of this variant is that an A to C polymorphism is found in codon 16, still in the signal peptide (Supplementary Figure 7). This second SNP, which is found in TK1 (homozygous), NB1, and ABT, changes the threonine encoded in the reference sequence (ACC) to a proline (CCC). If the threonine to proline SNP is also present in

the allele with the glycine to arginine SNP, then the second amino acid change could affect the secretion properties of the enzyme.

We tested the hypothesis that the sequenced Bushmen genomes have a higher SNP rate than other ethnic groups in genes related to lipid metabolism. We focused on the following genes: *AACS*, *ABCA1*, *ABCD1*, *ABHD5*, *ACADL*, *ACADM*, *ACADS*, *ACADVL*, *ACAT1*, *ACSL1*, *ALDH3A2*, *ANGPTL4*, *APOA2*, *ARSA*, *ASAHI*, *ASIP*, *CLN3*, *CLPS*, *CPT1A*, *CPT1B*, *CPT1C*, *CPT2*, *CYP27A1*, *DECR1*, *DHCR7*, *EHHADH*, *ETFDH*, *FADS2*, *GALC*, *GBA*, *GLA*, *GLB1*, *GM2A*, *HADH*, *HADHA*, *HADHB*, *HEXA*, *HEXB*, *HMGCL*, *HMGCS1*, *LIPA*, *LIPE*, *LIPF*, *LPIN2*, *LPL*, *MLYCD*, *MTTP*, *NPC1*, *NPC2*, *PLA2G1B*, *PLTP*, *PNLIP*, *PNPLA2*, *PSAP*, *SAR1B*, *SCP2*, *SLC22A5*, *SLC25A20* and *SMPD1*. Pooling the Bushmen's amino-acid SNPs, we found that 90 of their 23,430 SNPs were in these lipid-related genes. For a pooled sample of six non-Bushmen, 126 of 36,296 SNPs were in these genes. The ratio for Bushmen (0.384%) was slightly higher than for non-Bushmen (0.347%), but the following reasoning shows that the difference is not significant.

We have  $n=23,430$  approximately independent trials with  $x=90$  successes from a population with success probability  $p$ , and  $m=36,296$  approximately independent trials with  $y=126$  successes from a population with success probability  $q$ . We want to test the null hypothesis  $p=q$  against the alternative  $p>q$ . Because of the very large number of trials, under the null hypothesis, the test statistic:

$$Z = \frac{\frac{x}{n} - \frac{y}{m}}{\sqrt{\left(\frac{x+y}{n+m}\right)\left(1 - \frac{x+y}{n+m}\right)\left(\frac{1}{n} + \frac{1}{m}\right)}}$$

has approximately an  $N(0,1)$  normal distribution. The observed value of the statistic is:

$$Z = \frac{0.00384 - 0.00347}{\sqrt{\left(\frac{216}{59726}\right)\left(1 - \frac{216}{59726}\right)\left(\frac{1}{23430} + \frac{1}{36296}\right)}} = \frac{0.00384 - 0.00347}{\sqrt{0.00362 \times 0.99638 \times 0.00007}} = \frac{0.00037}{0.00005} = 0.7363$$

The (right-tail)  $p$ -value associated with this under an  $N(0,1)$  distribution is very high, namely 0.23077. Thus, we cannot reject the null hypotheses that the two populations have the same success probability.

### Bitter taste alleles

The ability or inability to sense a bitter taste from the compound phenylthiocarbamide (PTC) has been hypothesized to directly impact human survival and maintenance of human health. The necessity for foraging societies to accurately discriminate toxic plants, would suggest an ideal situation for strong trait selection. The taste receptor gene *TAS2R38* has therefore been an important marker used to determine the evolution not only of modern humans, but also Neanderthal society<sup>27,28</sup>. Two major *TAS2R38* haplotypes have been described and occur as a

result of three non-synonymous SNPs, namely Ala49Pro (rs713598 G>C), Ala262Val (rs1726866 C>T) and Isl296Val (rs10246939 A>G). PAV (Proline-Alanine-Valine) defines the dominant bitter taste sense haplotype, while AVI (Alanine-Valine-Isoleucine) defines the recessive non-taster haplotype. The predominance of the PAV haplotype in the Bushmen compared to the non-taster AVI haplotype in ABT is suggestive that these alleles may have undergone selective advantage in Bushmen. Further analysis of 12 Bushmen made possible by inclusion of the Ala262Val and Isl296Val variants on the Illumina 1M SNP array identified all of them as PAV for the bitter taste sense contributing alleles. The apparent fixation of these alleles is suggestive of strong selection for acute taste discrimination in a hunter-gatherer, perhaps to avoid toxic plants, but that selection has been relaxed in other populations.

### Genes related to hearing

Reportedly, Bushmen have better hearing than Europeans, especially at higher frequencies and also as they age<sup>29,30</sup>. We found Bushmen-specific amino-acid SNPs in two genes in which other SNPs are associated with deafness, *CDH23* and *USH2A* (Supplementary Table 6). Given that altered function of these genes can lead to deafness<sup>31,32</sup>, one can speculate that other SNPs in these genes might lead to enhanced hearing. In support of this, we note that the valine in *CDH23* (heterozygous in KB1, rare in non-Bushmen) is the ancestral amino acid, based on comparisons with other primates. Our extensive computational analysis of these SNPs in *CDH23* and *USH2A* can be found at:

[http://genomewiki.ucsc.edu/index.php/CDH23\\_SNPs](http://genomewiki.ucsc.edu/index.php/CDH23_SNPs) and

[http://genomewiki.ucsc.edu/index.php/USH2A\\_SNPs](http://genomewiki.ucsc.edu/index.php/USH2A_SNPs).

Experimental testing of this hypothesis may be appropriate. In any case, this illustrates in detail how computational analysis of our data can suggest potential genetic underpinnings for novel Bushmen-specific phenotypes.



## Supplementary Tables

**Supplementary Table 1. Y-chromosome haplogroup distribution for 20 Bushmen hunters<sup>1</sup> and three European control men from Namibia.** Haplogrouping was based on 13 Y-chromosome markers. “ybp” = years before present.

| Population<br>Y-chromosome<br>Haplogrouping <sup>3</sup> | A: restricted<br>to Africa<br>(60,000 ybp) |          | B: restricted to Africa<br>(50,000 ybp) |      |          |      | E: predominant in Africa and African-<br>Americans (emerged via back migration<br>into Africa, 50,000 ybp) |     |       |          | Asian/<br>Indonesian | Non-African |
|----------------------------------------------------------|--------------------------------------------|----------|-----------------------------------------|------|----------|------|------------------------------------------------------------------------------------------------------------|-----|-------|----------|----------------------|-------------|
|                                                          | Haplogroup <sup>2</sup>                    | A2       | A3b1                                    | B2a  | B2b      | B2b2 | B2b4b                                                                                                      | E2b | E1b1a | E1b1a4   |                      |             |
| 1 <sup>st</sup> Marker                                   | M14                                        | M51      | M150                                    | M112 | M115     | M211 | M90                                                                                                        | M2  | M154  | M35      | M175                 | M9          |
| 2 <sup>nd</sup> Marker                                   | -                                          | -        | -                                       | -    | -        | -    | M98                                                                                                        | -   | -     | -        | -                    | -           |
| European                                                 | 3                                          | 0        | 0                                       | 0    | 0        | 0    | 0                                                                                                          | 0   | 0     | 0        | 0                    | 3           |
| Ju/'hoansi                                               | 13                                         | <b>6</b> | <b>4</b>                                | 0    | 0        | 0    | 0                                                                                                          | 1   | 0     | 2        | 0                    | 0           |
| !Kung (Etosha)                                           | 4                                          | 0        | 0                                       | 0    | 0        | 0    | 0                                                                                                          | 0   | 0     | <b>4</b> | 0                    | 0           |
| !Kung (Vasekela)                                         | 2                                          | 1        | 0                                       | 0    | 0        | 0    | 0                                                                                                          | 1   | 0     | 0        | 0                    | 0           |
| Tuu-speaker                                              | 1                                          | 0        | 0                                       | 0    | <b>1</b> | 0    | 0                                                                                                          | 0   | 0     | 0        | 0                    | 0           |

<sup>1</sup> A single individual was selected from each indigenous Namibian hunter-gatherer-identified Y-haplogroup (bold) to undergo extensive sequencing. <sup>2</sup> Population grouping showing predominant representation by the selected haplogroups<sup>33</sup> with classification as per the Y-chromosome consortium (<http://ycc.biosci.arizona.edu/>) 2008 nomenclature update<sup>4</sup>. <sup>3</sup> Haplogroup continent restriction and estimated emergence times. Haplogroup A sub-groups A2 and A3b1 are seen in Southern Africa, with A3b1 seen exclusively among the Khoisan. Haplogroup B sub-group B2a is seen among Cameroonians, East Africans, and among South African Bantu speakers, while B2b is seen among Central African Pygmies and South African Khoisan. Haplogroup E is similar to D and absent from Africa. E1b1a is an African lineage believed to have expanded from northern African to sub-Saharan and equatorial Africa with the Bantu agricultural expansion. E1b1a is also the most common lineage among African-Americans. E1b1b1 clusters are seen today in Western Europe, Southeast Europe, the Near East, Northeast Africa and Northwest Africa. Haplogroup population definitions are as defined by the International Society of Genetic Genealogy Y-DNA Haplogroup Tree 2009 (<http://www.isogg.org/tree/index09.html>)<sup>34</sup>.

**Supplementary Table 2. Basic sequencing statistics for the four Bushmen and the Bantu individual (ABT).**

| Dataset                 | Reads         | Bases                 | Mapped bases                | CCDS bases  |
|-------------------------|---------------|-----------------------|-----------------------------|-------------|
| Whole genome, KB1       | 102,183,3331  | 35,449,827,671        | 28,752,706,821              | 387,254,418 |
| Whole genome, NB1       | 18,358,065    | 6,346,320,615         | 5,628,293,380               | 67,499,362  |
| Exome, KB1              | 4,404,906     | 1,673,892,693         | 1,553,034,524               | 394,557,680 |
| Exome, TK1              | 4,617,978     | 1,782,031,524         | 1,662,823,253               | 427,869,030 |
| Exome, MD8              | 4,160,900     | 1,528,147,776         | 1,434,923,452               | 364,612,818 |
| Exome, NB1              | 4,174,479     | 1,575,488,489         | 1,472,771,775               | 370,750,962 |
| Exome, ABT              | 5,091,760     | 1,904,113,845         | 1,777,384,376               | 479,353,490 |
| Illumina, KB1           | 539,541,278   | 81,072,943,456        | 74,755,457,272 <sup>2</sup> | 761,387,859 |
| SOLiD, ABT              | 3,402,047,834 | 198,473,661,900       | 78,696,971,148              | 471,682,954 |
| Illumina, ABT           | 160,174,952   | 24,346,592,704        | 22,940,710,656              | 218,499,375 |
|                         |               |                       |                             |             |
| <b>Paired-end reads</b> | <b>Reads</b>  | <b>Clone coverage</b> | <b>Mapped reads</b>         |             |
| KB1                     | 18,851,688    | 37,834,318,516        | 3,859,796                   |             |

<sup>1</sup>Whole-genome reads for KB1 consist of fragment reads (83,331,226 / 29,165,432,509 / 26,100,525,922 / 283,829,027 reads / bases / mapped bases / CCDS<sup>35</sup> bases), both halves of paired-end reads that are successfully mapped as pairs (12,230,249 / 4,526,728,484 / 1,293,023,468 / 11,098,860), and “rejected” paired-end reads (those that cannot be used as pairs because the linker is either non-existent or is too close to one end to leave a useful half) (6,621,858 / 1,757,666,678 / 1,359,157,431 / 923,26,531).

<sup>2</sup>The numbers for Illumina include reads that map non-uniquely but which are assigned a genomic location at random.

**Supplementary Table 3. Statistics from whole exome sequencing.**

| Sample | Reads <sup>1</sup> | Bases/read <sup>2</sup> | Reads mapped to genome <sup>3</sup> | Reads mapped to exome <sup>4</sup> | Bases mapped to exome | Coverage <sup>5</sup> |
|--------|--------------------|-------------------------|-------------------------------------|------------------------------------|-----------------------|-----------------------|
| KB1    | 4,404,906          | 380                     | 4,016,126                           | 2,898,126                          | 394,003,271           | 15.8X                 |
| NB1    | 4,174,479          | 377                     | 3,833,171                           | 2,706,077                          | 370,095,481           | 14.9X                 |
| TK1    | 4,617,978          | 386                     | 4,239,016                           | 3,057,422                          | 427,178,039           | 17.2X                 |
| MD8    | 4,160,900          | 367                     | 3,849,275                           | 2,697,468                          | 364,088,625           | 14.6X                 |
| ABT    | 5,091,760          | 374                     | 4,697,586                           | 3,480,207                          | 478,844,708           | 19.3X                 |

<sup>1</sup> Number of sequencing reads per sample/array.

<sup>2</sup> Average or mean sequencing read length.

<sup>3</sup> Number of reads mapped to the human genome.

<sup>4</sup> Number of reads mapped to the targeted exome (need to use 175,829 as the denominator when calculating this number).

<sup>5</sup> Average coverage per exome.

**Supplementary Table 4. Number of SNPs identified for pairs of mitochondrial sequences. “CRS” = Cambridge Reference Sequence.**

|     | CRS | ABT | KB1 | NB1 | NB8 |
|-----|-----|-----|-----|-----|-----|
| CRS | -   | 100 | 89  | 96  | 95  |
| ABT | 100 | -   | 51  | 84  | 55  |
| KB1 | 89  | 51  | -   | 77  | 38  |
| NB1 | 96  | 84  | 77  | -   | 75  |
| NB8 | 95  | 55  | 38  | 75  | -   |

**Supplementary Table 5. Human divergence dating using analysis of whole genome mitochondria data**

| tMRCA Group                        | M. Ingman et al 2000 <i>Nature</i> (Mitochondria) <sup>14</sup> | I. McDougall et al 2005 <i>Nature</i> (Geological) <sup>36</sup> | J. P. Noonan et al 2006 <i>Science</i> (Genomic) <sup>37</sup> | M. K. Gonder et al 2007 <i>Mol. Biol. Evol.</i> (Mitochondria) <sup>38</sup> | R. E. Green et al 2008 <i>Cell</i> (Mitochondria) <sup>39</sup> | A. W. Briggs et al 2009 <i>Science</i> (Mitochondria) <sup>40</sup> | Our dataset under Relaxed Clock<br>30 x 10M MCMC chain                                                                                                                                                                              | Our Dataset under Fixed Clock<br>27M MCMC chain                                                                                                                                                                                      |
|------------------------------------|-----------------------------------------------------------------|------------------------------------------------------------------|----------------------------------------------------------------|------------------------------------------------------------------------------|-----------------------------------------------------------------|---------------------------------------------------------------------|-------------------------------------------------------------------------------------------------------------------------------------------------------------------------------------------------------------------------------------|--------------------------------------------------------------------------------------------------------------------------------------------------------------------------------------------------------------------------------------|
| H. sapiens sapiens and Neanderthal | NA                                                              | NA                                                               | 706.0 (468.0 – 1015.0)                                         | NA                                                                           | 660.0 (520.0 – 800.0)                                           | NA                                                                  | Calibrating Point 660.0 (520.0 – 800.0)                                                                                                                                                                                             | Calibrating Point 660.0 (520.0 – 800.0)                                                                                                                                                                                              |
| H. sapiens sapiens                 | 171.5 (121.5 – 221.5)                                           | > 195.0 (190.0 – 200.0)                                          | NA                                                             | 194.3 (161.8 – 226.8)                                                        | NA                                                              | 136.1 (94.93 – 178.7)                                               | 204.9 (116.8 – 295.7)                                                                                                                                                                                                               | 237.2 ()                                                                                                                                                                                                                             |
| Neanderthal                        | NA                                                              | NA                                                               | NA                                                             | NA                                                                           | NA                                                              | 109.8 (84.63 – 138.5)                                               | 130.3 (89.7 – 174.3)                                                                                                                                                                                                                | 141.2 ()                                                                                                                                                                                                                             |
| L0                                 | NA                                                              | NA                                                               | NA                                                             | 146.4 (121.3 – 171.5)                                                        | NA                                                              | NA                                                                  | 158.7 (88.6 – 231.5)                                                                                                                                                                                                                | 187.9 ()                                                                                                                                                                                                                             |
| L0d                                | NA                                                              | NA                                                               | NA                                                             | 106.0 (85.8 – 126.2)                                                         | NA                                                              | NA                                                                  | 107.2 (56.8 – 159.9)                                                                                                                                                                                                                | 129.8 ()                                                                                                                                                                                                                             |
| Tanzanian L0d                      | NA                                                              | NA                                                               | NA                                                             | 30.6 (12.8 – 48.4)                                                           | NA                                                              | NA                                                                  | 32.0 (14.6 – 51.6)                                                                                                                                                                                                                  | 36.5 ()                                                                                                                                                                                                                              |
| San L0d                            | NA                                                              | NA                                                               | NA                                                             | 90.4 (71.5 – 109.3)                                                          | NA                                                              | NA                                                                  | 92.8 (47.6 – 139.1)                                                                                                                                                                                                                 | 113.0 ()                                                                                                                                                                                                                             |
| L0k, L0f, L0a                      | NA                                                              | NA                                                               | NA                                                             | 139.8 (115.2 – 164.4)                                                        | NA                                                              | NA                                                                  | 148.2 (NA)                                                                                                                                                                                                                          | 176.9 ()                                                                                                                                                                                                                             |
| L0k                                |                                                                 |                                                                  |                                                                | 70.9 (51.2 – 90.6)                                                           |                                                                 |                                                                     | 78.6 (37.2 – 122.0)                                                                                                                                                                                                                 | 94.5 ()                                                                                                                                                                                                                              |
| L0f, L0a                           |                                                                 |                                                                  |                                                                | 100.1 (87.6 – 112.6)                                                         |                                                                 |                                                                     | 118.8 (63.1 – 175.9)                                                                                                                                                                                                                | 144.0 ()                                                                                                                                                                                                                             |
| L0f                                |                                                                 |                                                                  |                                                                | 94.9 (85.5 – 104.3)                                                          |                                                                 |                                                                     | 93.8 (46.9 – 139.7)                                                                                                                                                                                                                 | 117.2 ()                                                                                                                                                                                                                             |
| L0a                                |                                                                 |                                                                  |                                                                | 54.6 (48.9 – 60.3)                                                           |                                                                 |                                                                     | 61.1 (29.2 – 95.1)                                                                                                                                                                                                                  | 71.4 ()                                                                                                                                                                                                                              |
| L1, L2, L3, M, N                   | NA                                                              | NA                                                               | NA                                                             | 142.3 (104.1 – 180.5)                                                        | NA                                                              | NA                                                                  | 172.7 (95.2 – 249.7)                                                                                                                                                                                                                | 200.9 ()                                                                                                                                                                                                                             |
| L3, M, N                           |                                                                 |                                                                  |                                                                | 94.3 (84.4 – 104.2)                                                          |                                                                 |                                                                     | 93.3 (50.7 – 136.5)                                                                                                                                                                                                                 | 96.0 ()                                                                                                                                                                                                                              |
| Note                               |                                                                 |                                                                  |                                                                |                                                                              |                                                                 |                                                                     | Range in parentheses is the 95% HPD interval                                                                                                                                                                                        |                                                                                                                                                                                                                                      |
| Comments:                          |                                                                 |                                                                  |                                                                |                                                                              |                                                                 |                                                                     | GTR + I + Gamma4, Relaxed Clock, Coalescence Expansion Growth, One tMRCA calibration, Six carbon dating data, MCMC chain length 300M, 10% BEAST burn-in. 300030 trees, TreeAnnotator burn-in 10000 trees. Tracer indicate ESS > 600 | GTR + I + Gamma4, Strict Clock, Coalescence Expansion Growth, One tMRCA calibration, Six carbon dating data, MCMC chain length 27M, 10% BEAST burn-in. 27000 trees, TreeAnnotator burn-in 1000 trees. Tracer indicates all ESS > 470 |

\*Time Unit in thousands of years.

Supplementary Table 6. Bushman genotypes associated with phenotypes. ‘Ref.’ is the human reference assembly.

| Gene           | NCBI  | Build 36    | HGMD or dbSNP ID | Ref. | KB1 | NB1 | MD8  | TK1  | ABT  | known? | Association                                                                                                                                                                                  | PubMed id |
|----------------|-------|-------------|------------------|------|-----|-----|------|------|------|--------|----------------------------------------------------------------------------------------------------------------------------------------------------------------------------------------------|-----------|
| <i>ACTN3</i>   | chr11 | 66,084,671  | rs1815739:T/C    | T    | C   | C   | ?    | ?    | C    | known  | (C:C) possibly increased sprint/power performance; encodes Arg.(C:T) mix of sprinting & endurance muscles;(T:T) possibly increased endurance; T makes a translation terminator               | 12879365  |
| <i>CDH23</i>   | chr10 | 73,142,571  | none             | T    | T/G | T   | T    | T    | T/G  | novel  | Encodes a cadherin-like protein in neurosensory epithelium. Variants in <i>CDH23</i> are associated with Usher syndrome 1D and deafness. Leu:Leu/Val: Val in ancestral                       | 11090341  |
| <i>CLCNKB</i>  | chr1  | 16,251,312  | CM040216         | T    | A/T | A   | ?    | A    | A    | known  | Increased chloride channel activity, association with T (Thr481Ser)                                                                                                                          | 14675050  |
| <i>CYP2G</i>   | chr19 | 46,260,114  | rs10513607       | Term | G   | G   | Term | Term | Term | known  | Cytochrome P450, family 2, subfamily g. Gene loss in most humans, but is an active gene in Bushmen. expressed "exclusively" in the olfactory mucosa of mice; involved in steroid metabolism. | 18085818  |
| <i>DARC</i>    | chr1  | 157,441,307 | rs2814778        | T    | T   | T   | T    | T/C  | C    | known  | Malaria resistant C-allele                                                                                                                                                                   | 19180233  |
| <i>LCT</i>     | chr2  | 136,325,116 | rs4988235        | C    | C   | C   | C    | C    | C    | known  | Lactase persistence T-allele                                                                                                                                                                 | 11788828  |
| <i>LIPA</i>    | chr10 | 90,997,319  | rs1051339        | C    | C/T | C   | C    | C    | C/T  | known  | Putatively associated with Wolman disease                                                                                                                                                    | 11441129  |
| <i>SLC24A5</i> | chr15 | 46,213,776  | rs1426654        | A    | G   | G   | G    | G    | G    | known  | Pale pigmentation A-allele                                                                                                                                                                   | 16357253  |
| <i>TAS2R38</i> | chr7  | 141,319,073 | rs10246939:T/C   | T    | C   | T/C | C    | C    | T    | known  | (C:C) can taste bitter;(C:T) can taste bitter;(T:T) unable to taste bitter                                                                                                                   | 12595690  |
| <i>TAS2R38</i> | chr7  | 141,319,814 | rs713598:C/G     | C    | G   | C/G | G    | G    | C    | known  | (G:G) can taste bitter;(C:G) can taste bitter;(C:C) unable to taste bitter                                                                                                                   | 12595690  |
| <i>UGT1A3</i>  | chr2  | 234,302,542 | CM042128         | T    | C   | T/C | T/C  | T/C  | T    | known  | UDP-glucuronosyltransferase activity is higher in the Trp11Arg (121% to 369% compared to major allele, depending on other variants in gene) for estrone metabolism                           | 14986168  |
| <i>USH2A</i>   | chr1  | 213,999,628 | none             | C    | C/T | C/T | C/T  | C    | C    | novel  | Mutations in <i>USH2A</i> are known to cause Usher syndrome type IIa, which is characterized by deafness and gradual vision loss                                                             | 9624053   |
| <i>VDR</i>     | chr12 | 46,559,162  | CM972826         | T    | C   | T/C | C    | C    | C    | known  | Higher bone mineral density, association with C; use of different translation start site                                                                                                     | 9169350   |

**Supplementary Table 7. Some Gene Ontology categories in which the 6,623 genes with Bushmen-specific amino-acid differences are over- or under-represented.**

| GO identifier | <i>p</i> -value | Over (+) or under (-) abundance | Informal GO category description                 |
|---------------|-----------------|---------------------------------|--------------------------------------------------|
| 0007606       | 7.40e-25        | +                               | sensory perception of chemical stimulus          |
| 0007608       | 2.22e-23        | +                               | sensory perception of smell                      |
| 0044255       | 6.50e-16        | +                               | cellular lipid metabolic process                 |
| 0019953       | 3.10e-15        | +                               | sexual reproduction                              |
| 0007601       | 6.37e-15        | +                               | visual perception                                |
| 0031402       | 1.29e-13        | +                               | sodium ion binding                               |
| 0007605       | 2.89e-11        | +                               | sensory perception of sound                      |
| 0019882       | 9.40e-11        | -                               | antigen processing and presentation              |
| 0019226       | 6.82e-09        | +                               | transmission of nerve impulse                    |
| 0007517       | 7.70e-09        | +                               | muscle organ development                         |
| 0001501       | 1.32e-08        | +                               | skeletal system development                      |
| 0009611       | 4.33e-07        | +                               | response to wounding                             |
| 0006954       | 5.68e-06        | +                               | inflammatory response                            |
| 0022603       | 5.50e-05        | +                               | regulation of anatomical structure morphogenesis |

Supplementary Table 8. Validated KB1 copy-number variants (CNVs).

| geneName  | name         | chrM | txStart     | txEnd       | size   | KB1 medCN | NA18507 medCN | JDW medCN | YH medCN | WGAC bp | WGAC percent | cn-dir increased | num-probes | mean log <sup>2</sup> |
|-----------|--------------|------|-------------|-------------|--------|-----------|---------------|-----------|----------|---------|--------------|------------------|------------|-----------------------|
| KLHL17    | NM 198317    | 1    | 936,110     | 941,162     | 5,053  | 2.8       | 1.6           | 1.7       | 1.7      | 0       | 0.0%         | KB1              | 46         | 0.133315217           |
| ATAD3C    | NM 001039211 | 1    | 1,470,336   | 1,490,805   | 20,470 | 4.3       | 3.2           | 4.1       | 3.6      | 16,121  | 78.8%        | KB1              | 127        | 0.040551181           |
| ATAD3B    | NM 031921    | 1    | 1,492,431   | 1,516,848   | 24,418 | 4.5       | 3.1           | 3.4       | 3.4      | 24,418  | 100.0%       | KB1              | 168        | -0.010464286          |
| ATAD3A    | NM 018188    | 1    | 1,532,822   | 1,555,331   | 22,510 | 5.0       | 3.3           | 3.8       | 3.6      | 22,510  | 100.0%       | KB1              | 162        | 0.06916358            |
| CDC2L2    | NM 033529    | 1    | 1,666,332   | 1,687,953   | 21,622 | 4.5       | 3.1           | 3.9       | 3.2      | 16,420  | 75.9%        | KB1              | 152        | -0.012404605          |
| ESPN      | NM 031475    | 1    | 6,419,114   | 6,455,269   | 36,156 | 4.9       | 3.1           | 3.1       | 4.0      | 31,756  | 87.8%        | KB1              | 286        | 0.113879371           |
| NBPF1     | NM 017940    | 1    | 16,635,718  | 16,685,288  | 49,571 | 49.6      | 48.0          | 43.4      | 46.3     | 49,533  | 99.9%        | KB1              | 259        | 0.050870656           |
| CROCC     | NM 014675    | 1    | 16,993,751  | 17,044,780  | 51,030 | 5.7       | 3.0           | 2.8       | 3.3      | 32,413  | 63.5%        | KB1              | 356        | 0.211876404           |
| RHD       | NM 001127691 | 1    | 25,344,297  | 25,402,252  | 57,956 | 4.2       | 2.6           | 3.2       | 3.4      | 57,956  | 100.0%       | KB1              | 391        | 0.327299233           |
| RHCE      | NM 138618    | 1    | 25,434,057  | 25,492,679  | 58,623 | 4.1       | 2.6           | 3.2       | 3.1      | 58,449  | 99.7%        | KB1              | 394        | 0.254420051           |
| AMY2A     | NM 006699    | 1    | 103,872,020 | 103,880,414 | 8,395  | 14.0      | 10.5          | 5.7       | 10.8     | 8,395   | 100.0%       | KB1              | 65         | 0.399453846           |
| AMY1A     | NM 004038    | 1    | 104,004,461 | 104,013,331 | 8,871  | 15.0      | 11.0          | 5.7       | 10.4     | 8,871   | 100.0%       | KB1              | 69         | 0.562384058           |
| PRMT6     | NM 018137    | 1    | 107,311,451 | 107,313,956 | 2,506  | 3.3       | 2.2           | 1.9       | 2.2      | 0       | 0.0%         | KB1              | 24         | 0.07475               |
| GSTM2     | NM 001142368 | 1    | 109,922,686 | 109,938,660 | 15,975 | 4.0       | 2.9           | 3.1       | 3.3      | 10,518  | 65.8%        | KB1              | 120        | 0.144604167           |
| GSTM1     | NM 000561    | 1    | 109,942,460 | 109,948,408 | 5,949  | 4.6       | 2.6           | 3.0       | 2.8      | 5,948   | 100.0%       | KB1              | 56         | 0.82675               |
| IGSF3     | NM 001542    | 1    | 116,829,073 | 116,922,356 | 93,284 | 7.1       | 5.9           | 6.8       | 5.0      | 73,003  | 78.3%        | KB1              | 810        | 0.006508025           |
| FAM108A3  | NM 001080422 | 1    | 143,545,025 | 143,549,782 | 4,758  | 20.0      | 7.4           | 14.6      | 11.2     | 3,724   | 78.3%        | KB1              | 32         | 0.247484375           |
| RPTN      | NM 001122965 | 1    | 148,939,144 | 148,944,777 | 5,634  | 0.9       | 2.4           | 2.2       | 2.8      | 0       | 0.0%         | NA18507          | 56         | -0.208571429          |
| MSTO1     | NM 018116    | 1    | 152,393,080 | 152,397,830 | 4,751  | 2.8       | 4.0           | 3.7       | 3.9      | 4,751   | 100.0%       | NA18507          | 46         | -0.153967391          |
| FCER1G    | NM 004106    | 1    | 157,998,160 | 158,002,111 | 3,952  | 0.0       | 1.7           | 1.6       | 1.6      | 0       | 0.0%         | NA18507          | 30         | -0.187433333          |
| FCGR2A    | NM 001136219 | 1    | 158,288,260 | 158,302,414 | 14,155 | 3.1       | 4.2           | 4.3       | 3.8      | 3,867   | 27.3%        | NA18507          | 116        | -0.288969828          |
| FCGR3B    | NM 000570    | 1    | 158,324,606 | 158,332,855 | 8,250  | 3.2       | 4.4           | 4.1       | 4.0      | 0       | 0.0%         | NA18507          | 68         | -0.470294118          |
| FCGR3A    | NM 001127593 | 1    | 158,324,606 | 158,333,468 | 8,863  | 3.1       | 4.4           | 3.9       | 3.8      | 0       | 0.0%         | NA18507          | 73         | -0.45589726           |
| FCGR2C    | NM 001005410 | 1    | 158,364,613 | 158,375,530 | 10,918 | 2.9       | 4.0           | 4.0       | 3.5      | 11,112  | 10.2%        | NA18507          | 95         | -0.462821053          |
| CFHR3     | NM 021023    | 1    | 193,475,587 | 193,494,529 | 18,943 | 3.1       | 2.0           | 5.0       | 3.8      | 12,709  | 67.1%        | KB1              | 99         | 0.437929293           |
| CFHR1     | NM 002113    | 1    | 193,520,518 | 193,532,973 | 12,456 | 2.8       | 1.6           | 3.8       | 2.8      | 12,455  | 100.0%       | KB1              | 90         | 0.458661111           |
| MRPL55    | NM 181465    | 1    | 224,601,115 | 224,603,748 | 2,634  | 4.6       | 2.0           | 2.7       | 2.2      | 0       | 0.0%         | KB1              | 19         | 0.059                 |
| SYT15     | NM 031912    | 10   | 46,378,534  | 46,390,607  | 12,074 | 6.8       | 3.8           | 4.0       | 4.3      | 6,052   | 50.1%        | KB1              | 101        | 0.087455446           |
| GPRIN2    | NM 014696    | 10   | 46,413,552  | 46,420,573  | 7,022  | 4.7       | 3.5           | 4.2       | 3.9      | 0       | 0.0%         | KB1              | 66         | 0.054537879           |
| FAM22A    | NM 001099338 | 10   | 88,975,185  | 88,984,713  | 9,529  | 16.3      | 9.4           | 11.6      | 11.1     | 9,529   | 100.0%       | KB1              | 89         | 0.09191573            |
| FAM22D    | NM 001009610 | 10   | 89,107,457  | 89,120,432  | 12,976 | 15.4      | 9.1           | 11.5      | 11.1     | 12,976  | 100.0%       | KB1              | 121        | 0.078115702           |
| HPS6      | NM 024747    | 10   | 103,815,137 | 103,817,782 | 2,646  | 3.3       | 2.1           | 2.4       | 1.9      | 0       | 0.0%         | KB1              | 26         | 0.059326923           |
| CYP2E1    | NM 000773    | 10   | 135,229,748 | 135,241,501 | 11,754 | 4.5       | 2.0           | 2.5       | 2.1      | 0       | 0.0%         | KB1              | 101        | 0.561806931           |
| SYCE1     | NM 130784    | 10   | 135,256,285 | 135,271,757 | 15,473 | 3.6       | 1.9           | 1.7       | 1.9      | 1,887   | 12.2%        | KB1              | 116        | 0.508306034           |
| DUX4      | NM 033178    | 10   | 135,372,560 | 135,380,764 | 8,205  | 185.8     | 96.6          | 247.8     | 195.7    | 8,205   | 100.0%       | KB1              | 58         | 0.424715517           |
| NLRP6     | NM 138239    | 11   | 268,570     | 275,303     | 6,734  | 2.9       | 1.8           | 2.0       | 1.8      | 0       | 0.0%         | KB1              | 62         | 0.016080645           |
| EFCAB4A   | NM 173584    | 11   | 817,585     | 821,991     | 4,407  | 2.7       | 1.5           | 1.3       | 1.7      | 0       | 0.0%         | KB1              | 40         | 0.083725              |
| MUC6      | NM 005961    | 11   | 1,002,824   | 1,026,706   | 23,883 | 3.1       | 1.8           | 2.1       | 1.7      | 0       | 0.0%         | KB1              | 226        | 0.021827434           |
| CHRNA10   | NM 020402    | 11   | 3,643,393   | 3,649,190   | 5,798  | 0.8       | 1.9           | 1.8       | 1.8      | 0       | 0.0%         | NA18507          | 52         | -0.179009615          |
| KCNJ11    | NM 000525    | 11   | 17,363,374  | 17,366,782  | 3,409  | 4.4       | 2.3           | 3.4       | 3.1      | 0       | 0.0%         | KB1              | 28         | 0.134196429           |
| TIGD3     | NM 145719    | 11   | 64,878,858  | 64,881,658  | 2,801  | 3.8       | 1.9           | 2.2       | 2.2      | 0       | 0.0%         | KB1              | 22         | 0.056840909           |
| UNC93B1   | NM 030930    | 11   | 67,515,151  | 67,528,169  | 13,019 | 3.3       | 2.2           | 2.0       | 2.1      | 5,071   | 39.0%        | KB1              | 92         | 0.017478261           |
| FAM86C    | NM 152563    | 11   | 71,176,205  | 71,189,928  | 13,724 | 23.7      | 16.3          | 18.2      | 18.3     | 13,724  | 100.0%       | KB1              | 84         | 0.041767857           |
| CRYAB     | NM 001885    | 11   | 111,284,560 | 111,287,683 | 3,124  | 0.9       | 2.2           | 1.8       | 2.1      | 0       | 0.0%         | NA18507          | 30         | -0.200516667          |
| PATE1     | NM 138294    | 11   | 125,121,398 | 125,124,952 | 3,555  | 0.8       | 1.8           | 1.9       | 1.7      | 0       | 0.0%         | NA18507          | 34         | -0.208338235          |
| PRB1      | NM 199353    | 12   | 11,396,024  | 11,399,791  | 3,768  | 3.4       | 12.2          | 6.5       | 10.8     | 3,768   | 100.0%       | NA18507          | 29         | -0.34262069           |
| PRB2      | NM 006248    | 12   | 11,435,743  | 11,439,765  | 4,023  | 4.0       | 6.8           | 6.0       | 6.2      | 4,023   | 100.0%       | NA18507          | 28         | -0.292178571          |
| TUBA3C    | NM 006001    | 13   | 18,645,920  | 18,653,936  | 8,017  | 7.3       | 4.9           | 6.3       | 5.3      | 0       | 0.0%         | KB1              | 56         | 0.0205                |
| PRR20     | NM 198441    | 13   | 56,639,332  | 56,642,353  | 3,022  | 41.2      | 22.4          | 27.9      | 10.8     | 3,022   | 100.0%       | KB1              | 21         | 0.464                 |
| DHRS4L2   | NM 198083    | 14   | 23,527,867  | 23,545,459  | 17,593 | 4.3       | 5.5           | 5.5       | 5.4      | 17,592  | 100.0%       | NA18507          | 115        | -0.14183913           |
| DHRS4L1   | NM 001082488 | 14   | 23,575,550  | 23,590,420  | 14,871 | 3.8       | 4.9           | 5.1       | 4.7      | 297     | 2.0%         | NA18507          | 105        | -0.134119048          |
| SDR39U1   | NM 020195    | 14   | 23,978,814  | 23,981,847  | 3,034  | 1.0       | 2.2           | 2.7       | 2.1      | 0       | 0.0%         | NA18507          | 27         | -0.182685185          |
| ACOT1     | NM 001037161 | 14   | 73,073,681  | 73,080,251  | 6,571  | 2.5       | 1.3           | 1.3       | 2.0      | 6,571   | 100.0%       | KB1              | 38         | 0.393486842           |
| LOC272832 | NM 001145004 | 15   | 18,997,108  | 19,007,128  | 10,021 | 27.6      | 26.0          | 27.5      | 26.3     | 10,021  | 100.0%       | KB1              | 45         | 0.018655556           |
| LOC283767 | NM 001001413 | 15   | 20,287,610  | 20,297,366  | 9,757  | 26.0      | 22.1          | 25.7      | 26.1     | 9,757   | 100.0%       | KB1              | 45         | 0.045244444           |
| NIPAI     | NM 001142275 | 15   | 20,594,722  | 20,638,284  | 43,563 | 2.0       | 0.9           | 2.0       | 1.8      | 0       | 0.0%         | KB1              | 242        | 0.362549587           |
| GOLGA8E   | NM 001012423 | 15   | 20,986,537  | 20,999,864  | 13,328 | 35.5      | 34.5          | 35.7      | 37.9     | 13,328  | 100.0%       | KB1              | 47         | 0.075031915           |
| CHRFAM7A  | NM 148911    | 15   | 28,440,735  | 28,473,156  | 32,422 | 5.8       | 3.9           | 4.7       | 4.0      | 32,422  | 100.0%       | KB1              | 226        | -0.008878319          |
| GOLGA8A   | NM 181077    | 15   | 32,458,564  | 32,487,180  | 28,617 | 6.9       | 10.0          | 8.4       | 8.6      | 28,617  | 100.0%       | NA18507          | 196        | -0.244607143          |
| TEX9      | NM 198524    | 15   | 54,444,936  | 54,525,363  | 80,428 | 1.9       | 0.9           | 1.7       | 1.7      | 0       | 0.0%         | KB1              | 435        | 0.198298851           |
| GOLGA6    | NM 001038640 | 15   | 72,149,251  | 72,161,944  | 12,694 | 16.7      | 13.2          | 17.2      | 16.8     | 12,694  | 100.0%       | KB1              | 80         | 0.21210625            |
| RHOT2     | NM 138769    | 16   | 658,134     | 664,171     | 6,038  | 2.7       | 1.6           | 1.6       | 1.6      | 0       | 0.0%         | KB1              | 54         | 0.124666667           |
| STUB1     | NM 005861    | 16   | 670,116     | 672,768     | 2,653  | 3.0       | 1.9           | 1.4       | 2.0      | 0       | 0.0%         | KB1              | 22         | 0.062727273           |
| JMJD8     | NM 001005920 | 16   | 671,668     | 674,440     | 2,773  | 3.3       | 2.2           | 2.0       | 1.8      | 0       | 0.0%         | KB1              | 23         | 0.107978261           |
| WDR24     | NM 032259    | 16   | 674,703     | 680,401     | 5,699  | 2.8       | 1.8           | 2.0       | 1.9      | 0       | 0.0%         | KB1              | 51         | 0.085029412           |
| GNG13     | NM 016541    | 16   | 788,042     | 790,734     | 2,693  | 2.9       | 1.8           | 1.5       | 1.7      | 0       | 0.0%         | KB1              | 25         | 0.03934               |
| IGFALS    | NM 004970    | 16   | 1,780,422   | 1,783,710   | 3,289  | 3.1       | 1.8           | 1.5       | 1.7      | 0       | 0.0%         | KB1              | 32         | 0.089390625           |
| PKD1      | NM 000296    | 16   | 2,078,712   | 2,125,900   | 47,189 | 7.2       | 3.4           | 6.6       | 4.4      | 38,481  | 81.5%        | KB1              | 385        | 0.051514286           |
| PRSS33    | NM 152891    | 16   | 2,773,955   | 2,776,709   | 2,755  | 2.8       | 1.7           | 0.9       | 1.2      | 0       | 0.0%         | KB1              | 25         | 0.06256               |
| ALG1      | NM 019109    | 16   | 5,061,811   | 5,077,379   | 15,569 | 10.9      | 8.8           | 10.0      | 8.6      | 9,707   | 62.3%        | KB1              | 101        | 0.041673267           |
| FAM86A    | NM 201598    | 16   | 5,074,303   | 5,087,790   | 13,488 | 21.0      | 13.6          | 16.0      | 16.9     | 13,488  | 100.0%       | KB1              | 80         | 0.05915625            |
| PDXDC1    | NM 015027    | 16   | 14,976,334  | 15,039,053  | 62,720 | 3.9       | 5.3           | 5.0       | 3.9      | 55,935  | 89.2%        | NA18507          | 384        | -0.21915625           |
| OR4I3     | NM 152288    | 16   | 30,867,906  | 30,873,759  | 5,854  | 2.8       | 1.8           | 2.1       | 2.1      | 0       | 0.0%         | KB1              | 43         | 0.03355814            |
| SLC5A2    | NM 003041    | 16   | 31,401,940  | 31,409,592  | 7,653  | 3.1       | 1.9           | 2.3       | 1.9      | 0       | 0.0%         | KB1              | 63         | 0.094531746           |
| TP53TG3   | NM 016212    | 16   | 33,112,481  | 33,115,680  | 3,200  | 16.5      | 6.9           | 15.9      | 6.1      | 3,200   | 100.0%       | KB1              | 29         | 0.286844828           |
| PDPFR     | NM 017990    | 16   | 68,705,030  | 68,752,685  | 47,656 | 3.4       | 5.1           | 4.0       | 4.0      | 35,926  | 75.4%        | NA18507          | 261        | -0.358015326          |
| MRCL      | NM 173619    | 16   | 68,765,429  | 68,778,297  | 12,869 | 8.8       | 6.2           | 6.2       | 6.1      | 12,869  | 100.0%       | KB1              | 95         | 0.040868421           |
| CTRB2     | NM 001025200 | 16   | 73,795,496  | 73,798,573  | 3,078  | 4.4       | 2.3           | 3.3       | 2.6      | 1,533   | 49.8%        |                  |            |                       |

|          |    |           |    |             |             |        |      |      |      |      |        |        |         |     |              |
|----------|----|-----------|----|-------------|-------------|--------|------|------|------|------|--------|--------|---------|-----|--------------|
| FLJ25006 | NM | 144610    | 17 | 23,959,109  | 23,965,338  | 6,230  | 0.7  | 2.2  | 1.5  | 2.2  | 0      | 0.0%   | NA18507 | 49  | -0.216612245 |
| ARL17    | NM | 001039083 | 17 | 41,989,936  | 42,012,375  | 22,440 | 3.8  | 1.6  | 3.9  | 5.2  | 22,440 | 100.0% | KB1     | 121 | 0.380884298  |
| NPEPPS   | NM | 006310    | 17 | 42,963,443  | 43,055,641  | 92,199 | 3.5  | 8.3  | 4.4  | 3.5  | 62,993 | 68.3%  | NA18507 | 458 | -0.291865721 |
| GIP      | NM | 004123    | 17 | 44,390,917  | 44,400,954  | 10,038 | 1.4  | 2.7  | 2.0  | 3.0  | 0      | 0.0%   | NA18507 | 43  | -0.143290698 |
| POLRMT   | NM | 005035    | 19 | 568,223     | 584,568     | 16,346 | 3.0  | 2.0  | 2.5  | 2.3  | 0      | 0.0%   | KB1     | 118 | 0.037338983  |
| KSSIR    | NM | 032551    | 19 | 868,342     | 872,015     | 3,674  | 3.0  | 1.7  | 3.4  | 1.6  | 0      | 0.0%   | KB1     | 31  | 0.094887097  |
| NDUFS7   | NM | 024407    | 19 | 1,334,883   | 1,346,588   | 11,706 | 2.8  | 1.8  | 1.8  | 1.7  | 0      | 0.0%   | KB1     | 86  | 0.049627907  |
| FAM108A1 | NM | 031213    | 19 | 1,827,975   | 1,836,518   | 8,544  | 4.0  | 1.9  | 3.3  | 2.0  | 4,828  | 56.5%  | KB1     | 74  | 0.115695946  |
| ZNF555   | NM | 152791    | 19 | 2,792,482   | 2,805,033   | 12,552 | 1.4  | 2.7  | 4.0  | 2.9  | 0      | 0.0%   | NA18507 | 75  | -0.182393333 |
| FUT5     | NM | 002034    | 19 | 5,816,838   | 5,821,551   | 4,714  | 5.2  | 2.7  | 3.3  | 3.1  | 0      | 0.0%   | KB1     | 29  | 0.03327586   |
| MBD3L2   | NM | 144614    | 19 | 7,000,351   | 7,002,746   | 2,396  | 10.1 | 7.0  | 8.1  | 8.0  | 2,396  | 100.0% | KB1     | 21  | 0.408261905  |
| EPOR     | NM | 000121    | 19 | 11,349,475  | 11,356,019  | 6,545  | 3.1  | 2.1  | 2.3  | 2.0  | 0      | 0.0%   | KB1     | 46  | 0.036771739  |
| ZNF439   | NM | 152262    | 19 | 11,837,844  | 11,841,306  | 3,463  | 5.4  | 7.8  | 7.7  | 7.7  | 0      | 0.0%   | NA18507 | 30  | -0.187483333 |
| ZNF700   | NM | 144566    | 19 | 11,896,900  | 11,922,577  | 25,678 | 2.5  | 4.2  | 3.7  | 4.3  | 0      | 0.0%   | NA18507 | 139 | -0.190111511 |
| RASAL3   | NM | 022904    | 19 | 15,423,438  | 15,436,382  | 12,945 | 0.8  | 1.8  | 1.2  | 1.6  | 0      | 0.0%   | NA18507 | 85  | -0.151923529 |
| ISYNA1   | NM | 016368    | 19 | 18,406,625  | 18,409,943  | 3,319  | 3.4  | 2.0  | 2.9  | 2.1  | 0      | 0.0%   | KB1     | 27  | 0.102037037  |
| FCGBP    | NM | 003890    | 19 | 45,045,803  | 45,132,373  | 86,571 | 6.3  | 4.5  | 4.1  | 4.3  | 31,438 | 36.3%  | KB1     | 620 | -0.032360484 |
| CYP2A6   | NM | 000762    | 19 | 46,041,283  | 46,048,192  | 6,910  | 6.6  | 4.7  | 4.6  | 4.4  | 6,910  | 100.0% | KB1     | 62  | 0.094048387  |
| CEACAM5  | NM | 004363    | 19 | 46,904,370  | 46,926,276  | 21,907 | 3.1  | 4.5  | 4.5  | 4.5  | 0      | 0.0%   | NA18507 | 171 | -0.13769006  |
| CEACAM8  | NM | 001816    | 19 | 47,776,235  | 47,790,922  | 14,688 | 3.6  | 5.2  | 5.6  | 4.9  | 0      | 0.0%   | NA18507 | 112 | -0.127348214 |
| PSG3     | NM | 021016    | 19 | 47,917,635  | 47,936,508  | 18,874 | 10.3 | 11.4 | 10.2 | 9.2  | 18,874 | 100.0% | NA18507 | 139 | -0.12496403  |
| PSG8     | NM | 182707    | 19 | 47,950,225  | 47,961,671  | 11,447 | 9.9  | 13.3 | 12.6 | 11.2 | 11,447 | 100.0% | NA18507 | 93  | -0.194989247 |
| PSG1     | NM | 006905    | 19 | 48,063,198  | 48,075,711  | 12,514 | 10.3 | 13.4 | 13.0 | 9.9  | 12,514 | 100.0% | NA18507 | 100 | -0.18997     |
| PSG6     | NM | 002782    | 19 | 48,099,608  | 48,113,829  | 14,222 | 8.5  | 13.1 | 13.1 | 9.6  | 14,222 | 100.0% | NA18507 | 111 | -0.161837838 |
| PSG7     | NM | 002783    | 19 | 48,120,124  | 48,133,170  | 13,047 | 10.0 | 12.3 | 12.1 | 9.7  | 13,047 | 100.0% | NA18507 | 109 | -0.162458716 |
| PSG11    | NM | 203287    | 19 | 48,203,649  | 48,222,471  | 18,823 | 10.3 | 13.1 | 12.4 | 9.9  | 18,823 | 100.0% | NA18507 | 148 | -0.11710473  |
| PSG5     | NM | 002781    | 19 | 48,363,735  | 48,382,528  | 18,794 | 9.0  | 11.3 | 10.9 | 9.4  | 18,794 | 100.0% | NA18507 | 147 | -0.146755102 |
| PSG4     | NM | 002780    | 19 | 48,388,696  | 48,401,630  | 12,935 | 10.4 | 13.1 | 13.4 | 10.4 | 12,935 | 100.0% | NA18507 | 111 | -0.25104955  |
| PSG9     | NM | 002784    | 19 | 48,449,275  | 48,465,522  | 16,248 | 10.7 | 13.1 | 13.3 | 10.1 | 16,248 | 100.0% | NA18507 | 129 | -0.20755814  |
| SEPW1    | NM | 003009    | 19 | 52,973,654  | 52,979,751  | 6,098  | 1.3  | 2.6  | 2.0  | 3.7  | 0      | 0.0%   | NA18507 | 43  | -0.163174419 |
| RPS11    | NM | 001015    | 19 | 54,691,446  | 54,694,756  | 3,311  | 1.9  | 3.1  | 3.2  | 2.4  | 0      | 0.0%   | NA18507 | 26  | -0.175442308 |
| RFPLA4   | NM | 001145014 | 19 | 60,962,319  | 60,966,351  | 4,033  | 7.2  | 5.4  | 5.3  | 5.0  | 4,033  | 100.0% | KB1     | 34  | 0.249617647  |
| RHOB     | NM | 004040    | 2  | 20,568,463  | 20,570,828  | 2,366  | 2.7  | 1.7  | 2.9  | 1.8  | 0      | 0.0%   | KB1     | 23  | 0.075108696  |
| TCF23    | NM | 175769    | 2  | 27,283,653  | 27,287,384  | 3,732  | 3.3  | 2.1  | 1.9  | 2.1  | 0      | 0.0%   | KB1     | 29  | 0.013982759  |
| C2orf78  | NM | 001080474 | 2  | 73,922,971  | 73,955,929  | 32,959 | 2.6  | 7.2  | 9.5  | 14.1 | 26,245 | 79.6%  | NA18507 | 186 | -0.453905914 |
| TEK14    | NM | 144705    | 2  | 94,959,106  | 94,964,442  | 5,337  | 11.0 | 6.2  | 7.1  | 7.8  | 5,337  | 100.0% | KB1     | 49  | 0.111010204  |
| SMPD4    | NM | 017951    | 2  | 130,625,210 | 130,655,924 | 30,715 | 4.7  | 3.4  | 3.8  | 3.9  | 30,715 | 100.0% | KB1     | 222 | 0.053752252  |
| C2orf27  | NM | 013310    | 2  | 132,313,796 | 132,358,709 | 44,914 | 11.5 | 9.8  | 8.7  | 10.7 | 44,914 | 100.0% | KB1     | 312 | 0.0876875    |
| MGC50273 | NM | 214461    | 2  | 132,386,266 | 132,392,966 | 6,701  | 33.3 | 27.9 | 33.3 | 31.7 | 6,701  | 100.0% | KB1     | 44  | 0.114090909  |
| CHPF     | NM | 024536    | 2  | 220,229,174 | 220,233,992 | 4,819  | 3.1  | 2.0  | 2.4  | 2.3  | 0      | 0.0%   | KB1     | 45  | 0.065577778  |
| ALPP     | NM | 001632    | 2  | 233,068,853 | 233,073,102 | 4,250  | 5.2  | 3.2  | 3.8  | 3.7  | 4,250  | 100.0% | KB1     | 38  | 0.040736842  |
| ALPPL2   | NM | 031313    | 2  | 233,097,057 | 233,100,930 | 3,874  | 5.2  | 3.5  | 3.8  | 4.2  | 3,874  | 100.0% | KB1     | 37  | 0.039837838  |
| ALP1     | NM | 001631    | 2  | 233,146,338 | 233,150,247 | 3,910  | 4.0  | 2.9  | 3.8  | 3.2  | 0      | 0.0%   | KB1     | 39  | 0.063166667  |
| NDUFA10  | NM | 004544    | 2  | 240,620,146 | 240,684,788 | 64,643 | 3.0  | 1.8  | 2.0  | 1.9  | 0      | 0.0%   | KB1     | 553 | 0.294776673  |
| RNPEPL1  | NM | 018226    | 2  | 241,228,094 | 241,238,131 | 10,038 | 2.6  | 1.6  | 1.8  | 1.9  | 0      | 0.0%   | KB1     | 97  | 0.02164433   |
| AOP12A   | NM | 198998    | 2  | 241,351,252 | 241,357,889 | 6,638  | 4.1  | 2.7  | 2.8  | 3.0  | 6,638  | 100.0% | KB1     | 63  | 0.146007937  |
| GNRH2    | NM | 178331    | 20 | 2,972,268   | 2,974,391   | 2,124  | 3.6  | 2.2  | 2.2  | 2.2  | 0      | 0.0%   | KB1     | 20  | 0.062875     |
| THBD     | NM | 000361    | 20 | 22,974,271  | 22,978,301  | 4,031  | 2.7  | 1.6  | 1.8  | 1.9  | 0      | 0.0%   | KB1     | 40  | 0.08135      |
| CST4     | NM | 001899    | 20 | 23,614,277  | 23,617,662  | 3,386  | 5.7  | 4.0  | 4.2  | 4.9  | 3,386  | 100.0% | KB1     | 35  | 0.073871429  |
| C2orf134 | NM | 001024675 | 20 | 31,717,965  | 31,719,991  | 2,027  | 3.4  | 2.0  | 2.9  | 2.5  | 0      | 0.0%   | KB1     | 19  | 0.093526316  |
| SEM1     | NM | 003007    | 20 | 43,269,088  | 43,271,822  | 2,735  | 2.5  | 4.1  | 3.2  | 3.4  | 0      | 0.0%   | NA18507 | 26  | -0.200826923 |
| SEM2     | NM | 003008    | 20 | 43,283,424  | 43,286,512  | 3,089  | 2.3  | 4.9  | 5.0  | 4.0  | 0      | 0.0%   | NA18507 | 30  | -0.161666667 |
| NEURL2   | NM | 080749    | 20 | 43,950,674  | 43,953,308  | 2,635  | 4.4  | 1.9  | 2.0  | 1.9  | 0      | 0.0%   | KB1     | 19  | 0.074368421  |
| THAP7    | NM | 001008695 | 22 | 19,678,615  | 19,680,958  | 2,344  | 3.7  | 2.0  | 3.2  | 1.7  | 0      | 0.0%   | KB1     | 23  | 0.133395665  |
| LOC51233 | NM | 016449    | 22 | 22,275,194  | 22,299,041  | 23,848 | 3.2  | 4.4  | 4.0  | 4.0  | 15,467 | 64.9%  | NA18507 | 185 | -0.135435135 |
| DDT      | NM | 001355    | 22 | 22,638,108  | 22,646,573  | 8,466  | 3.4  | 1.8  | 3.3  | 3.6  | 8,056  | 95.2%  | KB1     | 60  | 0.335975     |
| GSTT2    | NM | 000854    | 22 | 22,646,868  | 22,650,660  | 3,793  | 3.6  | 2.0  | 2.8  | 3.6  | 3,793  | 100.0% | KB1     | 30  | 0.38805      |
| GST1     | NM | 000853    | 22 | 22,700,693  | 22,708,838  | 8,146  | 0.0  | 1.2  | 1.3  | 0.4  | 0      | 0.0%   | NA18507 | 54  | -0.807518519 |
| GGT1     | NM | 001032365 | 22 | 23,328,209  | 23,349,526  | 21,318 | 13.2 | 7.2  | 9.2  | 6.3  | 21,318 | 100.0% | KB1     | 137 | 0.181193431  |
| APOBEC3B | NM | 004900    | 22 | 37,702,905  | 37,713,283  | 10,379 | 3.3  | 2.2  | 2.6  | 3.1  | 10,290 | 99.1%  | KB1     | 91  | 0.240824176  |
| RRP7A    | NM | 015703    | 22 | 41,233,073  | 41,240,306  | 7,234  | 4.0  | 2.7  | 3.1  | 3.1  | 7,234  | 100.0% | KB1     | 54  | 0.200611111  |
| LMF2     | NM | 033200    | 22 | 49,231,524  | 49,236,257  | 4,734  | 3.8  | 1.9  | 2.4  | 1.9  | 0      | 0.0%   | KB1     | 41  | 0.035780488  |
| MST1     | NM | 020998    | 3  | 49,696,385  | 49,701,200  | 4,816  | 12.7 | 6.0  | 11.5 | 10.7 | 4,776  | 99.2%  | KB1     | 47  | 2.68E-01     |
| AMIGO3   | NM | 198722    | 3  | 49,729,969  | 49,732,127  | 2,159  | 3.5  | 1.7  | 2.7  | 2.1  | 0      | 0.0%   | KB1     | 22  | 0.115022727  |
| CISH     | NM | 013324    | 3  | 50,618,890  | 50,624,266  | 5,377  | 3.8  | 2.1  | 2.6  | 2.4  | 0      | 0.0%   | KB1     | 52  | 0.027278846  |
| TLR9     | NM | 017442    | 3  | 52,230,138  | 52,235,219  | 5,082  | 4.0  | 2.1  | 2.0  | 2.5  | 0      | 0.0%   | KB1     | 47  | 0.0045       |
| FAM157A  | NM | 001145248 | 3  | 199,367,547 | 199,396,038 | 28,492 | 13.0 | 9.9  | 11.0 | 8.3  | 28,492 | 100.0% | KB1     | 152 | -0.012078947 |
| SLC26A1  | NM | 213613    | 4  | 971,277     | 977,054     | 5,778  | 3.2  | 1.8  | 2.6  | 2.0  | 0      | 0.0%   | KB1     | 55  | 0.068145455  |
| DRD5     | NM | 000798    | 4  | 9,459,527   | 9,461,902   | 2,376  | 19.8 | 8.9  | 10.4 | 12.3 | 2,376  | 100.0% | KB1     | 23  | 0.156347826  |
| UGT2B15  | NM | 001076    | 4  | 69,693,104  | 69,717,150  | 24,047 | 2.3  | 4.1  | 4.5  | 2.6  | 24,047 | 100.0% | NA18507 | 139 | -0.308435252 |
| UGT2B11  | NM | 001073    | 4  | 70,246,807  | 70,261,209  | 14,403 | 5.8  | 8.9  | 9.0  | 7.2  | 14,403 | 100.0% | NA18507 | 112 | -0.123209821 |
| FRG2     | NM | 001005217 | 4  | 191,320,672 | 191,323,561 | 2,890  | 10.6 | 9.0  | 12.9 | 9.7  | 2,890  | 100.0% | KB1     | 24  | 0.055666667  |
| MGC29506 | NM | 016459    | 5  | 138,751,157 | 138,753,504 | 2,348  | 3.1  | 1.7  | 1.9  | 1.8  | 0      | 0.0%   | KB1     | 20  | 0.078725     |
| ZNF300   | NM | 052860    | 5  | 150,254,157 | 150,264,584 | 10,428 | 1.5  | 2.5  | 2.6  | 2.2  | 1,060  | 10.2%  | NA18507 | 89  | -0.15955618  |
| FGFR4    | NM | 022963    | 5  | 176,449,157 | 176,457,730 | 8,574  | 3.1  | 2.0  | 2.0  | 2.2  | 0      | 0.0%   | KB1     | 79  | 0.026537975  |
| HSPA1A   | NM | 005345    | 6  | 31,891,270  | 31,893,698  | 2,429  | 5.9  | 4.0  | 5.7  | 5.1  | 2,177  | 89.6%  | KB1     | 23  | 0.059934783  |
| TREML1   | NM | 178174    | 6  | 41,225,322  | 41,230,048  | 4,727  | 1.2  | 2.3  | 2.5  | 2.4  | 0      | 0.0%   | NA18507 | 37  | -0.175081081 |
| GSTA1    | NM | 145740    |    |             |             |        |      |      |      |      |        |        |         |     |              |

|                     |              |   |             |             |        |       |       |       |       |        |        |         |     |              |
|---------------------|--------------|---|-------------|-------------|--------|-------|-------|-------|-------|--------|--------|---------|-----|--------------|
| <i>PMS2L5</i>       | NM_174930    | 7 | 73,751,552  | 73,766,505  | 14,954 | 22.0  | 18.7  | 17.9  | 16.0  | 14,954 | 100.0% | KB1     | 23  | 0.242782609  |
| <i>LOC442590</i>    | NM_001099435 | 7 | 74,768,950  | 74,778,279  | 9,330  | 40.9  | 33.4  | 35.6  | 32.2  | 9,330  | 100.0% | KB1     | 20  | 0.052        |
| <i>DTX2</i>         | NM_020892    | 7 | 75,735,623  | 75,779,963  | 44,341 | 4.9   | 3.4   | 3.9   | 2.7   | 44,341 | 100.0% | KB1     | 310 | 0.007883871  |
| <i>UPK3B</i>        | NM_182684    | 7 | 75,784,396  | 75,801,848  | 17,453 | 3.4   | 2.1   | 2.4   | 1.6   | 17,453 | 100.0% | KB1     | 82  | 0.109890244  |
| <i>LOC100132832</i> | NM_001129851 | 7 | 76,313,448  | 76,327,006  | 13,559 | 24.0  | 22.6  | 21.7  | 19.8  | 13,559 | 100.0% | KB1     | 17  | 0.113088235  |
| <i>CYP3A4</i>       | NM_017460    | 7 | 98,999,255  | 99,026,459  | 27,205 | 2.6   | 3.7   | 3.4   | 3.4   | 27,205 | 100.0% | NA18507 | 203 | -0.129889163 |
| <i>STAG3</i>        | NM_012447    | 7 | 99,420,189  | 99,456,661  | 36,473 | 1.9   | 3.2   | 2.7   | 2.7   | 18,414 | 50.5%  | NA18507 | 229 | -0.130454148 |
| <i>ACHE</i>         | NM_000665    | 7 | 100,132,267 | 100,138,192 | 5,926  | 3.5   | 2.0   | 2.8   | 2.0   | 0      | 0.0%   | KB1     | 43  | 0.100093023  |
| <i>POLR2J1</i>      | NM_006234    | 7 | 101,707,270 | 101,713,101 | 5,832  | 11.5  | 8.5   | 7.8   | 10.4  | 4,996  | 85.7%  | KB1     | 43  | 0.159523256  |
| <i>RASA4</i>        | NM_001079877 | 7 | 101,813,883 | 101,851,140 | 37,258 | 11.1  | 6.1   | 6.5   | 7.8   | 37,258 | 100.0% | KB1     | 225 | 0.253435556  |
| <i>POLR2J2</i>      | NM_032959    | 7 | 101,871,425 | 101,906,133 | 34,709 | 19.7  | 12.1  | 12.9  | 13.2  | 34,709 | 100.0% | KB1     | 143 | 0.170545455  |
| <i>ZYX</i>          | NM_001010972 | 7 | 142,595,197 | 142,605,039 | 9,843  | 3.3   | 2.1   | 2.5   | 2.3   | 0      | 0.0%   | KB1     | 87  | 0.008074713  |
| <i>FLJ43692</i>     | NM_001003702 | 7 | 143,321,325 | 143,330,384 | 9,060  | 8.8   | 6.0   | 6.4   | 8.5   | 9,051  | 99.9%  | KB1     | 75  | 0.057346667  |
| <i>ARHGEF5</i>      | NM_005435    | 7 | 143,490,137 | 143,515,372 | 25,236 | 6.2   | 4.0   | 5.0   | 6.1   | 21,888 | 86.7%  | KB1     | 211 | 0.136881517  |
| <i>DEF41</i>        | NM_004084    | 8 | 6,841,698   | 6,844,122   | 2,425  | 12.6  | 7.6   | 9.1   | 6.1   | 2,425  | 100.0% | KB1     | 23  | 0.314173913  |
| <i>DEF43</i>        | NM_005217    | 8 | 6,860,805   | 6,863,226   | 2,422  | 12.0  | 7.6   | 8.6   | 6.2   | 0      | 0.0%   | KB1     | 24  | 0.324520833  |
| <i>SPAG11A</i>      | NM_001081552 | 8 | 7,742,812   | 7,758,729   | 15,918 | 5.6   | 2.9   | 1.9   | 4.2   | 15,918 | 100.0% | KB1     | 134 | 0.410011194  |
| <i>FAM86B2</i>      | NM_001137610 | 8 | 12,327,497  | 12,338,223  | 10,727 | 27.1  | 16.7  | 20.2  | 20.8  | 10,727 | 100.0% | KB1     | 67  | 0.123007463  |
| <i>REXO1L1</i>      | NM_172239    | 8 | 86,755,947  | 86,762,978  | 7,032  | 272.4 | 129.9 | 183.7 | 134.9 | 7,032  | 100.0% | KB1     | 50  | 0.36707      |
| <i>CYP11B1</i>      | NM_001026213 | 8 | 143,950,777 | 143,958,238 | 7,462  | 3.7   | 2.6   | 2.8   | 3.1   | 6,656  | 89.2%  | KB1     | 72  | 0.040833333  |
| <i>VPS28</i>        | NM_016208    | 8 | 145,619,808 | 145,624,735 | 4,928  | 3.3   | 2.0   | 2.1   | 2.0   | 0      | 0.0%   | KB1     | 43  | 0.049093023  |
| <i>PPP1R16A</i>     | NM_032902    | 8 | 145,692,917 | 145,698,311 | 5,395  | 2.6   | 1.6   | 1.8   | 1.9   | 0      | 0.0%   | KB1     | 52  | 0.008        |
| <i>LRRC14</i>       | NM_014665    | 8 | 145,714,199 | 145,721,365 | 7,167  | 3.1   | 2.0   | 1.8   | 2.0   | 0      | 0.0%   | KB1     | 65  | 0.027130769  |
| <i>WASH1</i>        | NM_182905    | 9 | 4,511       | 19,739      | 15,229 | 26.1  | 16.0  | 25.6  | 19.8  | 15,229 | 100.0% | KB1     | 133 | 0.16081203   |
| <i>AQP7</i>         | NM_001170    | 9 | 33,374,949  | 33,392,517  | 17,569 | 14.1  | 9.3   | 10.5  | 9.4   | 17,569 | 100.0% | KB1     | 139 | 0.003571942  |
| <i>FAM75A1</i>      | NM_001085452 | 9 | 39,657,015  | 39,663,247  | 6,233  | 13.0  | 11.1  | 13.6  | 11.5  | 6,233  | 100.0% | KB1     | 49  | 0.063295918  |
| <i>FAM22F</i>       | NM_017561    | 9 | 94,160,033  | 94,170,481  | 10,449 | 11.3  | 7.5   | 9.0   | 8.6   | 10,449 | 100.0% | KB1     | 84  | 0.076113095  |
| <i>SET</i>          | NM_001122821 | 9 | 128,525,488 | 128,538,229 | 12,742 | 3.5   | 4.7   | 4.0   | 4.1   | 1,752  | 13.7%  | NA18507 | 81  | -0.170783951 |
| <i>FBXW5</i>        | NM_018998    | 9 | 137,110,725 | 137,115,010 | 4,286  | 3.1   | 1.8   | 2.1   | 1.8   | 0      | 0.0%   | KB1     | 37  | 0.151310811  |

Validation was based on array CGH (comparative genomic hybridization) with the NA18507 (Yoruban) genome sequence<sup>41</sup>. “tx” = transcription, “medCN” = median copy number, “WGAC” = whole genome assembly comparison.

### Supplementary Table 9. Mitochondrial haplogroups<sup>42</sup> based on four informative Illumina 1M Duo mitochondrial SNPs.

|             | KB1 | NB1 | TK1 | MD8 | ABT |
|-------------|-----|-----|-----|-----|-----|
| MitoG1440A  | G   | A   | A   | A   | G   |
| MitoG2708A  | G   | A   | A   | A   | A   |
| MitoG15931A | G   | A   | A   | A   | G   |
| MitoG16130A | G   | A   | A   | A   | G   |

### Supplementary Table 10. Markers for NB1 and TK1 that define Y-haplogroup A<sup>1</sup>.

| SNP ID    | Position <sup>2</sup> | Name | Haplogroup | Change <sup>3</sup> | NB1 | TK1            |
|-----------|-----------------------|------|------------|---------------------|-----|----------------|
| rs3897    | 17080420              | M6   | A2         | T>C                 | T   | C              |
| rs3905    | 20181656              | M14  | A2         | T>C                 | T   | C              |
| rs2032633 | 20328114              | M49  | A2         | T>C                 | T   | C              |
| rs2032638 | 20353835              | M71  | A2         | C>T                 | C   | T              |
| rs2032664 | 14036089              | M212 | A2         | C>A                 | C   | C <sup>#</sup> |
| rs9341312 | 21151116              | P247 | A2         | T>A                 | T   | A              |
| rs9341314 | 21151209              | P248 | A2         | G>T                 | G   | T              |
| rs2032603 | 13477921              | M190 | A3b        | A>G                 | G   | A              |

<sup>1</sup>Identified using genotyping array data and/or genome sequencing data. <sup>2</sup>Position and <sup>3</sup>substitution based on NCBI Build 36 (hg18 reference sequence). <sup>#</sup>Genotype according to Illumina 1M array denotes TK1 as not being in the A2 haplogroup as per the M212 marker. This discordance may indicate genotyping error or a *de novo* mutation in this individual.



**Supplementary Table 11. Markers for KB1 that define Y-haplogroup B<sup>1</sup>.**

| SNP ID    | Position <sup>2</sup> | Name    | Haplogroup | Change <sup>3</sup> | KB1 |
|-----------|-----------------------|---------|------------|---------------------|-----|
| rs2032599 | 13360948              | M181    | B          | T>C                 | C   |
| rs9341290 | 13529972              | P85     | B          | T>C                 | C   |
| -         | 13359973              | P90     | B          | C>T                 | T   |
| rs2032601 | 13378470              | M182    | B2         | C>T                 | T   |
| -         | 20227347              | M112    | B2b        | C>T (G>A*)          | T   |
| rs2032662 | 13523656              | M192    | B2b        | C>T                 | T   |
| -         | 21906455              | 50f2(P) | B2b        | G>C                 | G   |
| -         | 6828265               | P6      | B2b1       | G>C                 | C   |

<sup>1</sup>Identified using genotyping array data and/or genome sequencing data. <sup>2</sup>Position and <sup>3</sup>substitution based on NCBI Build 36 (hg18 reference sequence). \*Strand orientation as per ref. 4.

**Supplementary Table 12. Markers for ABT and MD8 that define Y-haplogroup E<sup>1</sup>.**

| SNP ID     | Position <sup>2</sup> | Name     | Haplogroup | Change <sup>3</sup> | ABT | MD8 |
|------------|-----------------------|----------|------------|---------------------|-----|-----|
| rs9786489  | 10461457 *            | P167     | DE         | G>T                 | T   | T   |
| rs9786634  | 13174651 *            | P152     | E          | G>C                 | C   | C   |
| rs9786357  | 18009501 *            | P154     | E          | G>T                 | T   | T   |
| rs9786301  | 14847931 *            | P155     | E          | G>A                 | A   | A   |
| rs17842518 | 21853359 *            | P171     | E          | G>T                 | T   | T   |
| rs9786191  | 13313471 *            | P175     | E          | G>A                 | A   | A   |
| rs16980473 | 12669846              | P177     | E1b        | C>T                 | T   | T   |
| rs9786105  | 7461836 *             | P178     | E1b1       | G>A                 | A   | A   |
| -          | 20071555              | P1       | E1b1a      | C>T                 | T   | C   |
| rs16980394 | 17745841 *            | P182     | E1b1a      | G>A                 | A   | G   |
| rs16981297 | 8835178               | P293     | E1b1a      | G>A                 | A   | G   |
| rs2032598  | 13359735              | M180 P88 | E1b1a      | T>C                 | C   | T   |
| rs9786252  | 2971033 *             | -        | E1b1a      | G>A                 | A   | G   |
| rs768983   | 6878291 *             | -        | E1b1a      | G>A (C>T*)          | A   | G   |
| rs9786574  | 8647013 *             | -        | E1b1a      | C>T                 | T   | C   |
| rs16980754 | 8806440 *             | -        | E1b1a      | C>T                 | T   | C   |
| rs9785753  | 13176589 *            | -        | E1b1a      | C>T                 | T   | C   |
| rs9786100  | 13824441 *            | -        | E1b1a      | T>C                 | C   | T   |
| rs9786135  | 17246254 *            | -        | E1b1a      | C>T                 | T   | C   |
| rs16980561 | 21081419 *            | -        | E1b1a      | A>G                 | G   | A   |
| rs16980435 | 21531096 *            | -        | E1b1a      | C>T                 | T   | C   |
| rs9785875  | 22788755 *            | -        | E1b1a      | T>A                 | A   | T   |
| rs1971755  | 15087466 *            | -        | E1b1a      | A>G (T>C*)          | G   | A   |
| rs16980457 | 15222712 *            | -        | E1b1a      | G>T                 | T   | G   |
| rs16980588 | 14763088 *            | U175     | E1b1a8     | G>A                 | A   | G   |
| rs16980502 | 15804352 *            | U209     | E1b1a8a    | C>T                 | T   | C   |
| rs16980558 | 14088609              | P277     | E1b1a8a    | A>G                 | G   | A   |
| rs7067418  | 85227053              | P278     | E1b1a8a    | G>A                 | A   | G   |
| -          | 20201091              | M35      | E1b1b1     | G>C                 | G   | C   |
| rs2032640  | 20351960              | M81      | E1b1b1b    | C>T                 | C   | C   |
| rs2032613  | 20391026              | M107     | E1b1b1b1   | A>G                 | A   | A   |

<sup>1</sup>Identified using genotyping array data and/or genome sequencing data. <sup>2</sup>Position and <sup>3</sup>substitution based on NCBI Build 36 (hg18 reference sequence). \*Nucleotide position or strand orientation as per ref. 4.

**Supplementary Table 13. 5-by-5 *Fst* (fixation index) table depicting relationships among the five men using genome-wide SNP analysis.**

|            |               | <b>KB1</b> | <b>NB1</b> | <b>TK1</b> | <b>MD8</b> | <b>ABT</b> |
|------------|---------------|------------|------------|------------|------------|------------|
| <b>KB1</b> | Fst x1000     | 0          | 21         | 24         | 22         | 80         |
|            | <i>SD x1M</i> | -          | 4372       | 4785       | 4536       | 4902       |
| <b>NB1</b> | Fst x1000     | 21         | 0          | -7         | 6          | 91         |
|            | <i>SD x1M</i> | 4372       | -          | 5580       | 4398       | 4790       |
| <b>TK1</b> | Fst x1000     | 24         | -7         | 0          | 16         | 88         |
|            | <i>SD x1M</i> | 4785       | 5580       | -          | 4934       | 4916       |
| <b>MD8</b> | Fst x1000     | 22         | 6          | 16         | 0          | 61         |
|            | <i>SD x1M</i> | 4536       | 4398       | 4934       | -          | 4867       |
| <b>ABT</b> | Fst x1000     | 80         | 91         | 88         | 61         | 0          |
|            | <i>SD x1M</i> | 4902       | 4790       | 4916       | 4867       | -          |

**Supplementary Table 14. Evidence for gene-flow between ancestors of ABT and KB1.** An excess of sites at which ABT and KB1 share a derived allele relative to another genome, X, is a signal of admixture (see Ref. 43 for details). We searched for such an excess at 39,473 neutral, freely recombining, autosomal loci, each 1kb in size. Six different genomes were used in place of X. Positive values of the test statistic ( $C_{abt-x}$ ) indicate potential admixture between ancestors of KB1 and ABT. Statistical significance was assessed using a permutation test, as described in Ref. 43.

| <i>X</i> | Population | $C_{abt-x}^a$ | $\mu_0^b$ | $\sigma_0^c$ | $p^d$          |
|----------|------------|---------------|-----------|--------------|----------------|
| NA18507  | Yoruban    | 208.13        | 0.06      | 50.88        | <b>0.00002</b> |
| NA19240  | Yoruban    | 166.75        | -0.01     | 46.82        | <b>0.00018</b> |
| NA12891  | European   | 62.88         | 0.23      | 52.83        | 0.11735        |
| NA12892  | European   | 84.88         | 0.11      | 52.12        | 0.05218        |
| Korean   | Korean     | 117.50        | 0.22      | 52.40        | <b>0.01202</b> |
| Chinese  | Chinese    | 59.63         | 0.29      | 53.39        | 0.13180        |

<sup>a</sup>Observed value of test statistic, based on real data (see text).

<sup>b</sup>Mean of null distribution, as assessed by permutation test.

<sup>c</sup>Standard deviation of null distribution, as assessed by permutation test.

<sup>d</sup>Empirical one-sided *p*-value: fraction of 100,000 permuted data sets having test statistics at least as large as  $C_{abt-x}$ . Values of  $p < 0.05$  are highlighted in bold.

**Supplementary Table 15. KB1 genotypes at various unstable microsatellite loci.** Loci are identified in Pearson et al<sup>11</sup>. Only alleles supported by at least two reads are presented here. “Ref.” is the human reference genome (NCBI Build 36).

| Locus | Normal range | Disease range | Ref. | KB1  |
|-------|--------------|---------------|------|------|
| DRPLA | 7-25         | 49-88         | 15   | 9    |
| SCA10 | 10-22        | 800-4500      | 14   | 13   |
| SCA12 | 7-45         | 55-78         | 10   | 13   |
| SCA6  | 4-18         | 20-29         | 13   | 8/11 |

## Supplementary Figures

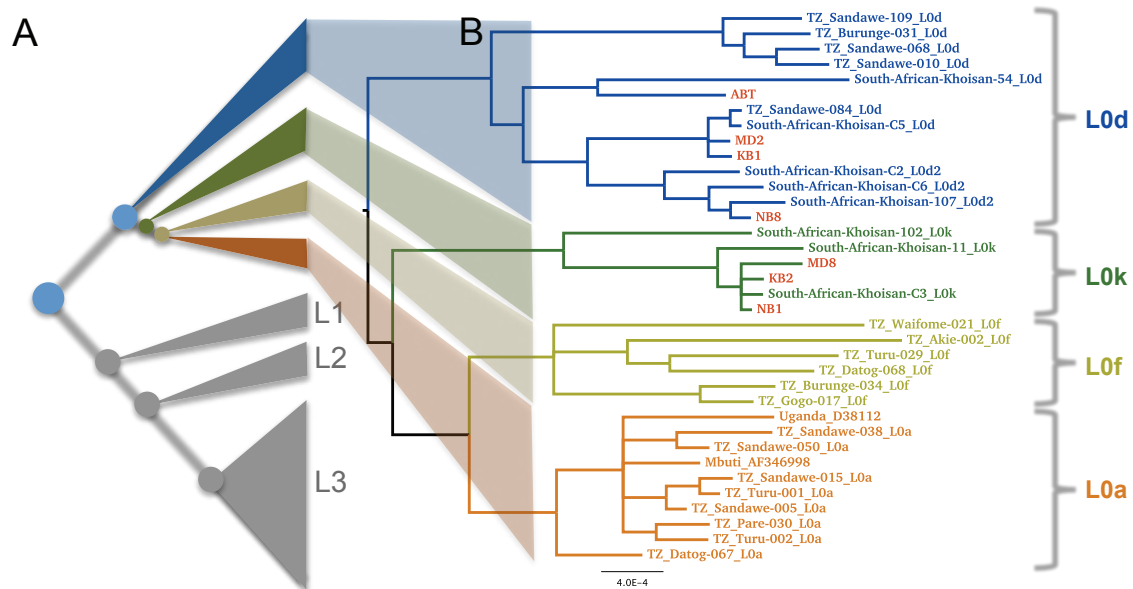**Supplementary Figure 1A. Phylogenetic trees.**

(A) Schematic tree of mitochondrial human haplogroups. (B) Bayesian phylogenetic tree of complete mitochondrial genomes from haplogroup L0. Individuals from this study are highlighted in red.

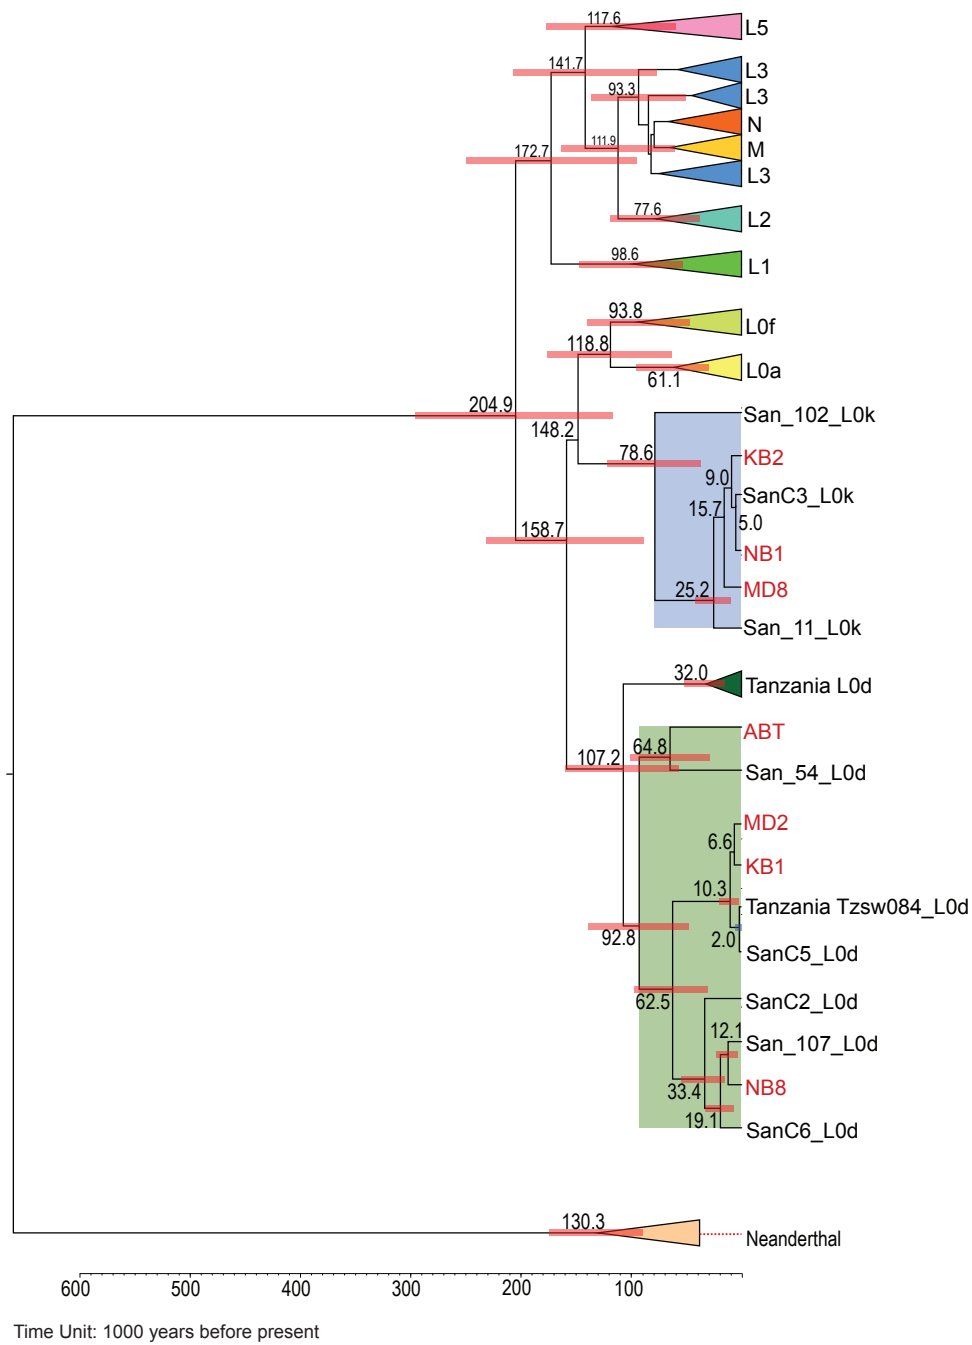

**Supplementary Figure 1B. BEAST analysis of 158 individuals based on complete mitochondria.** Individuals from this study are shown in red.

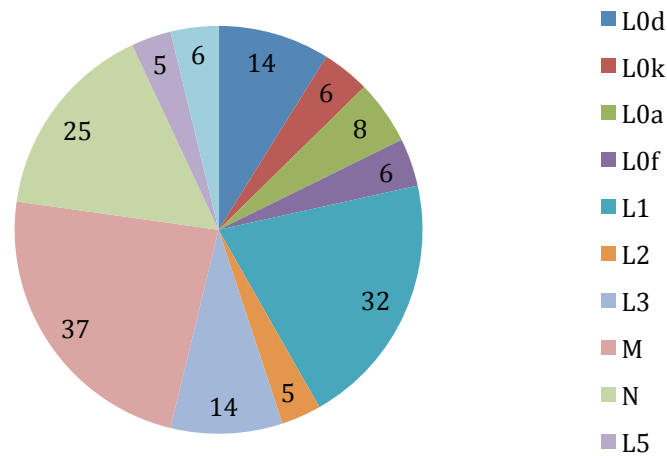

**Supplementary Figure 1C. Haplogroup composition of the human mitochondrial samples used.**

**A**

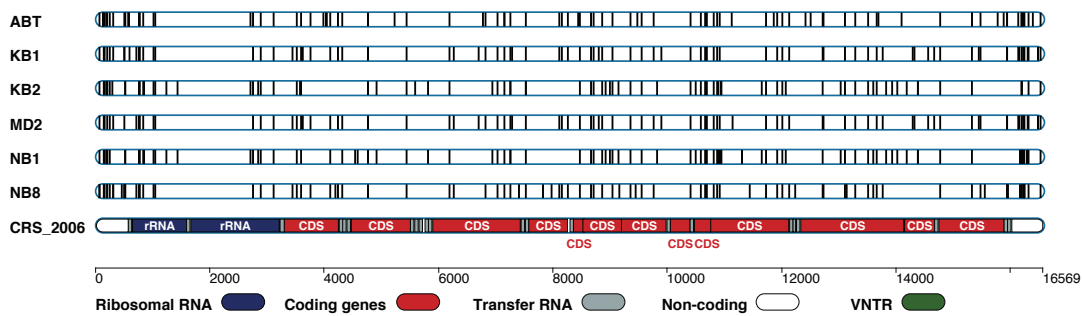

**B**

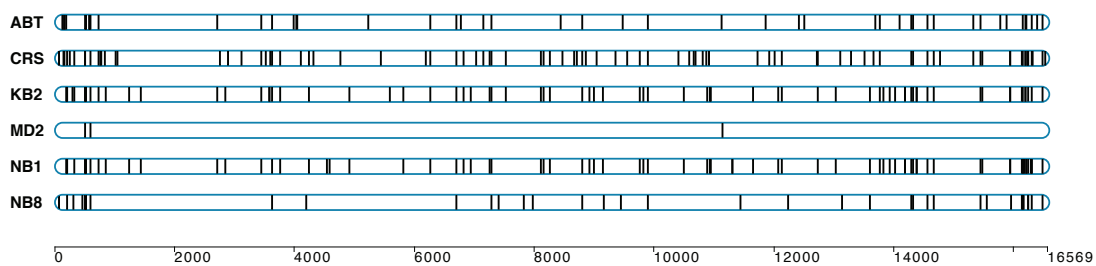

**Supplementary Figure 2. Sequence differences in the southern African participants' mitochondrial genomes. A) using the Cambridge reference sequence (CRS) as a reference; B) Using KB1 as a reference.**

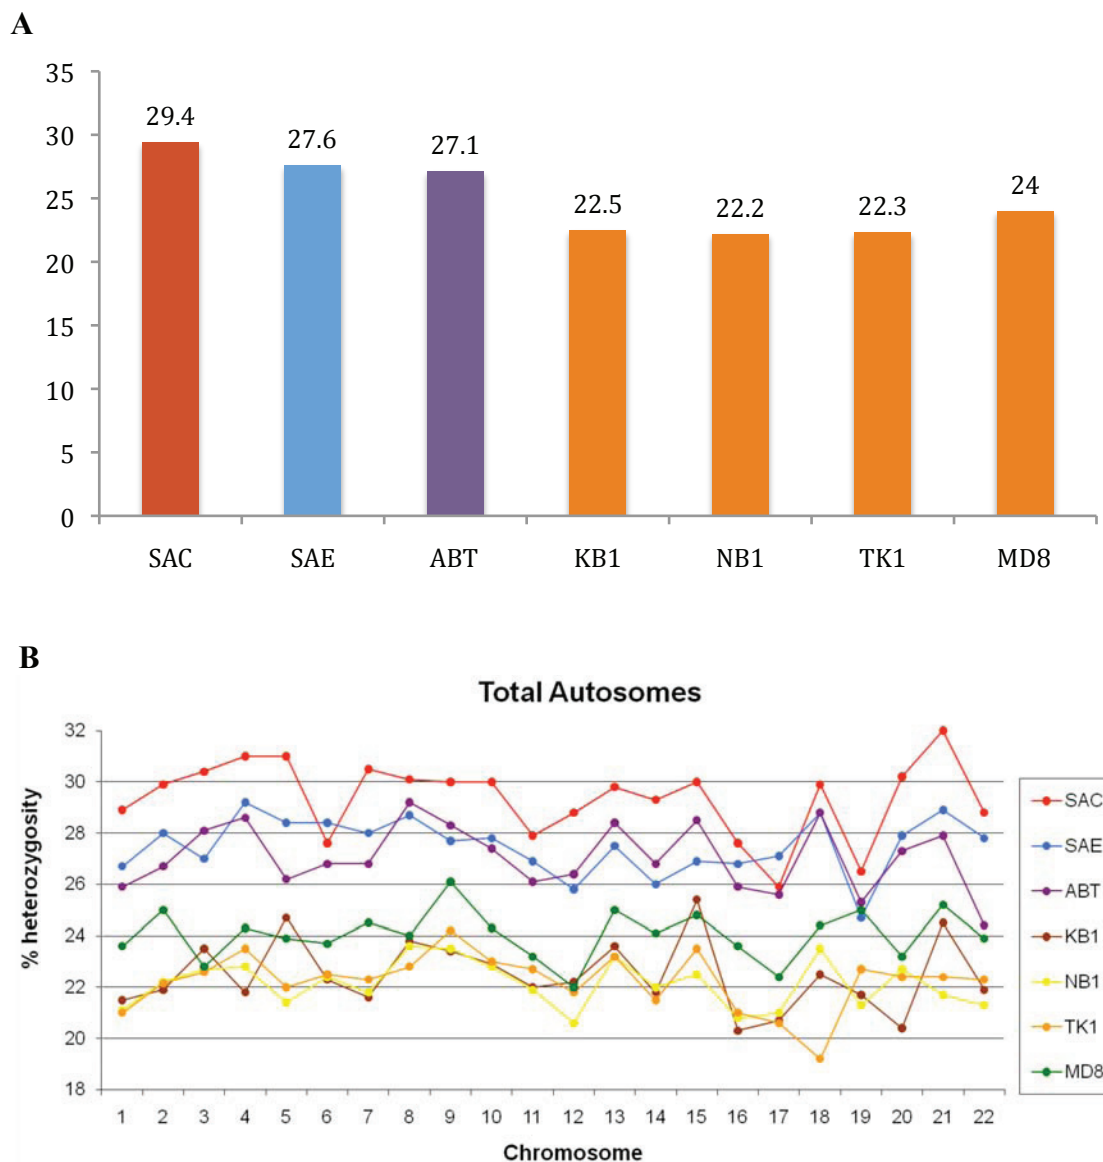

**Supplementary Figure 3. Heterozygosity from genotyping data.** Total (A) and per-autosome (B) genome-wide percentage heterozygosity for 1,105,569 autosomal SNPs in our five southern Africans compared to South African European (SAE) and admixed South African Coloured (SAC) samples. Total number of SNPs evaluated per chromosome: chr1, 95,287; chr2, 91,532; chr3, 75,838; chr4, 66,088; chr5, 68,079; chr6, 72,687; chr7, 60,929; chr8, 57,940; chr9, 49,319; chr10, 56,474; chr11, 56,274; chr12, 55,614; chr13, 39,234; chr14, 36,407; chr15, 33,933; chr16, 36,111; chr17, 34,644; chr18, 31,002; chr19, 27,235; chr20, 28,219; chr21, 14,906; and chr22, 17,817.

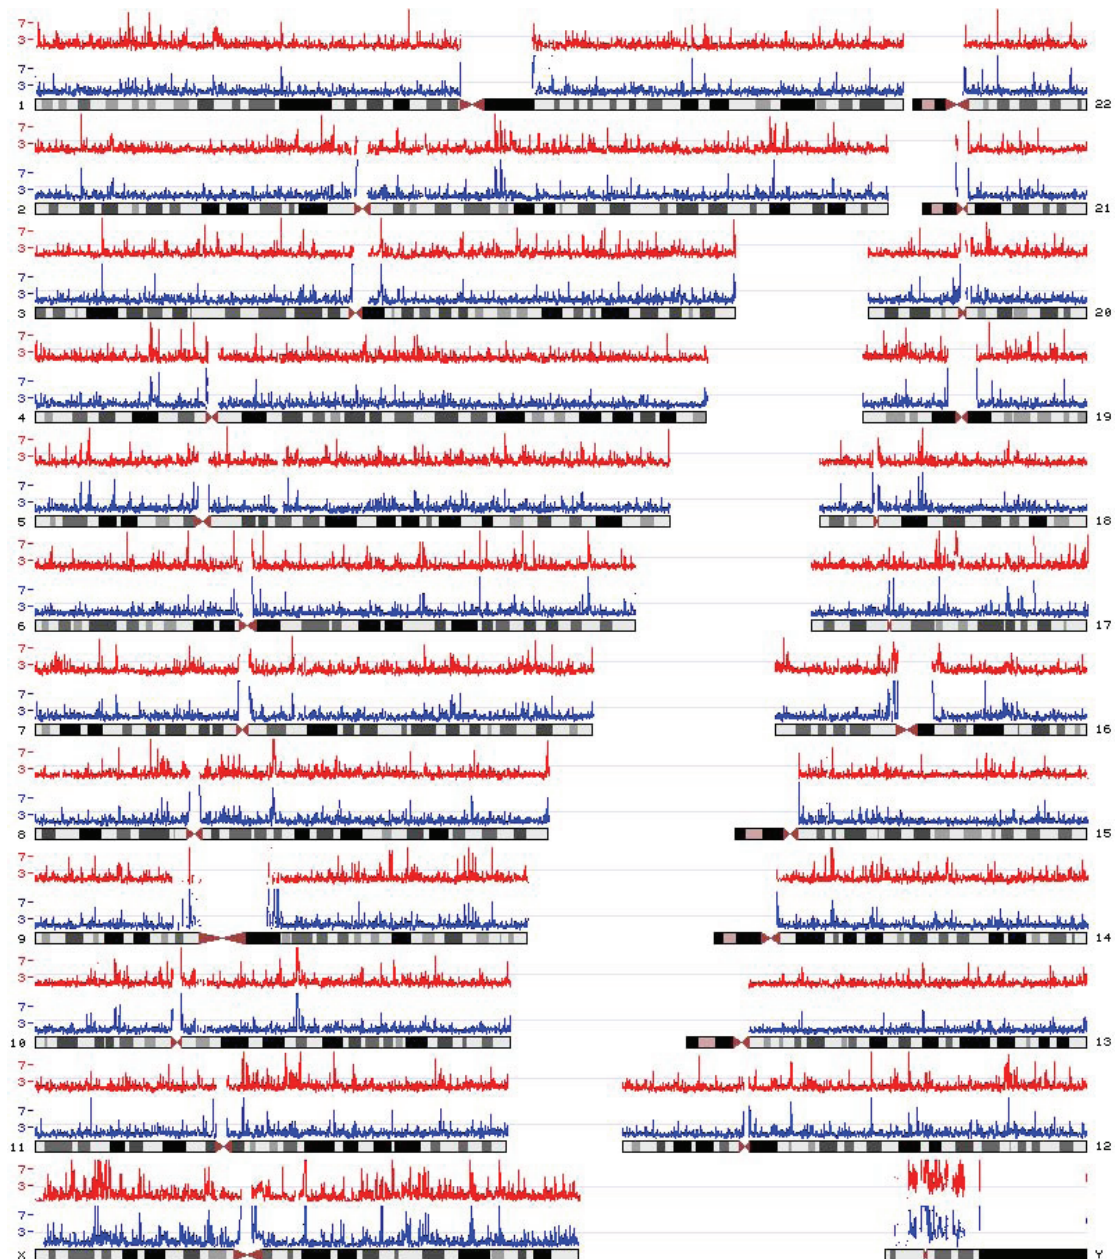

**Supplementary Figure 4. Variation in SNP rate.** Genome-wide SNP rates in KB1 (top, red) and ABT (bottom, blue), relative to the average for available human genomes.

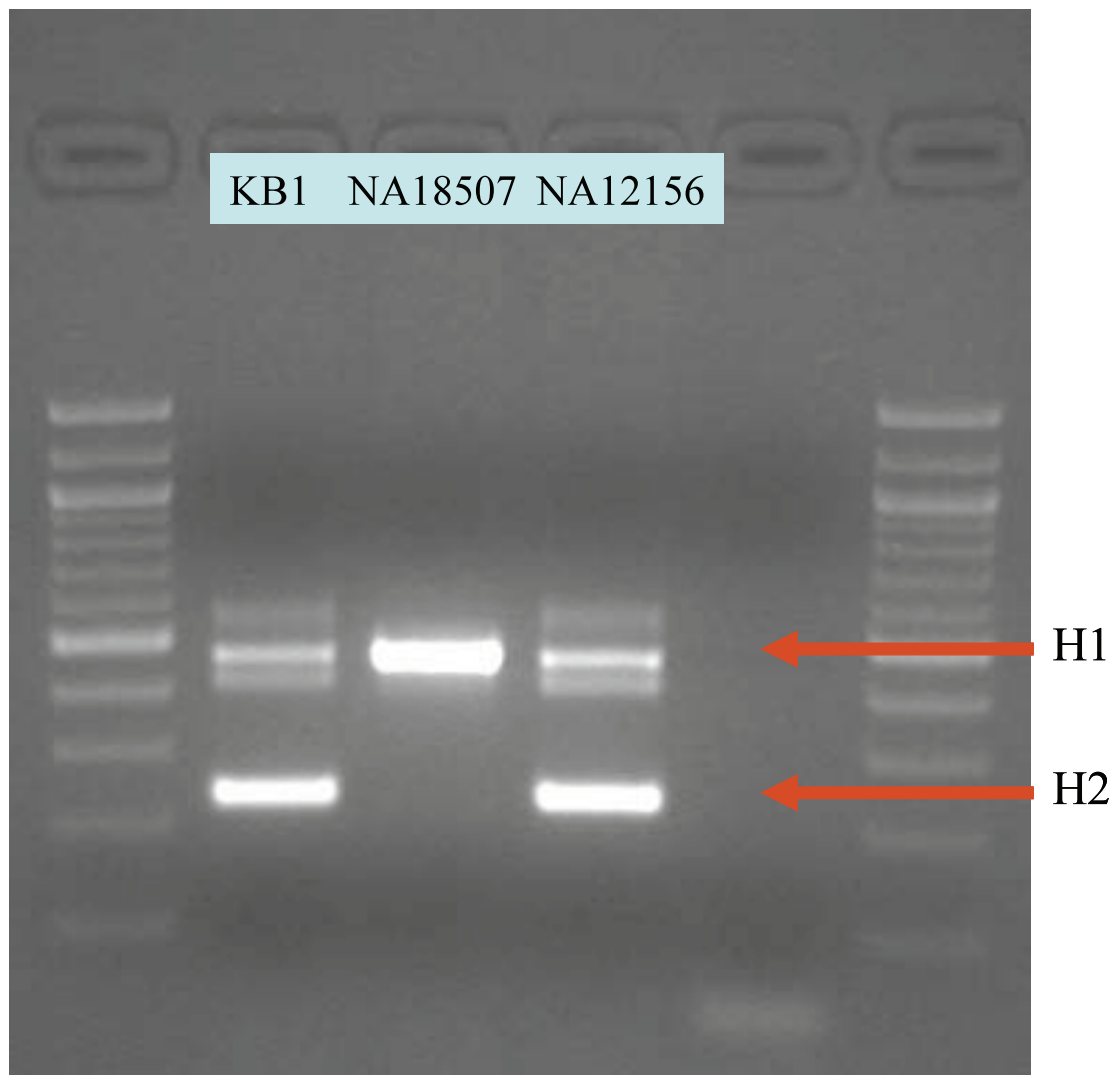

**Supplementary Figure 5. Verification of the H2 inversion in KB1.** Genotyping of a diagnostic indel confirms that KB1 is an H1/H2 heterozygote. Results for NA18507 (H1/H1) and NA12156 (H1/H2) are also shown. (See the main paper for a discussion.)



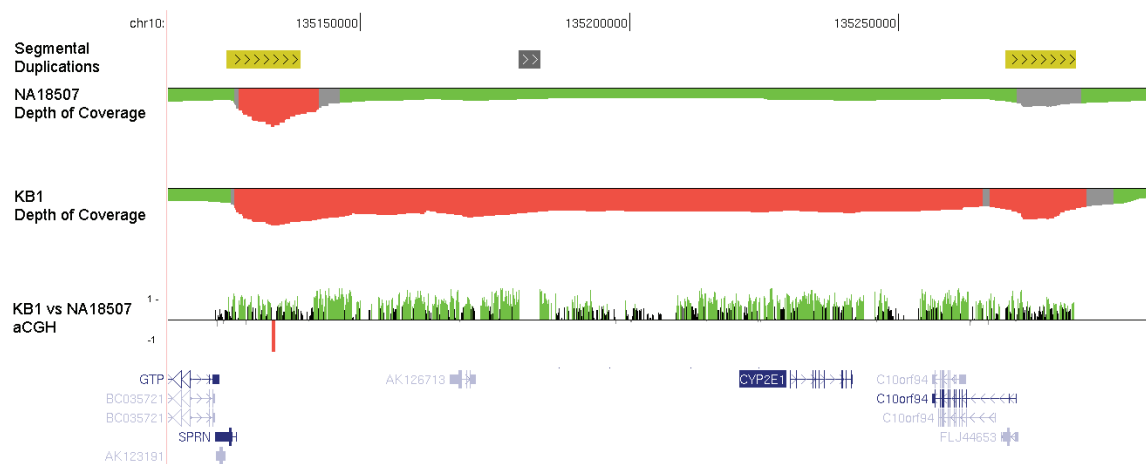

**Supplementary Figure 6A. Validation of 140-kb duplication on chr10 in KB1.** “aCGH” means array comparative genomic hybridization.

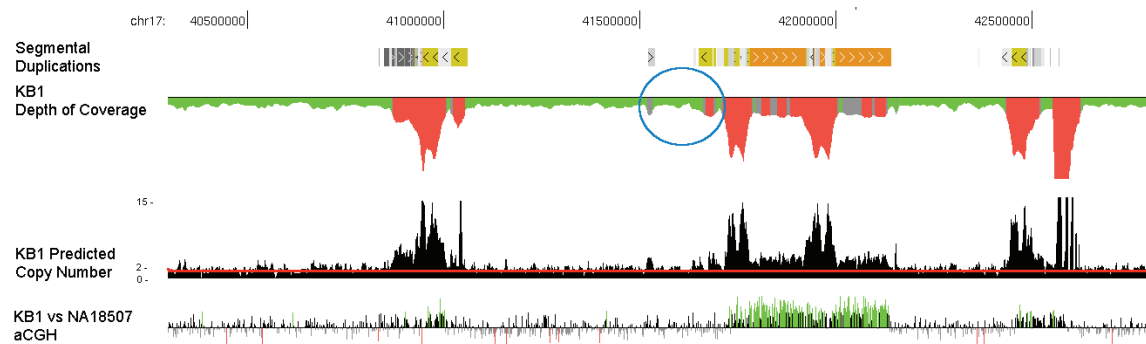

**Supplementary Figure 6B. Estimated copy number for the 17q21.3 locus in KB1.** The circled region corresponds to a segment found to be duplicated on all other examined H2 chromosomes. Read depth and array-CGH indicate that this duplication is not present in KB1.





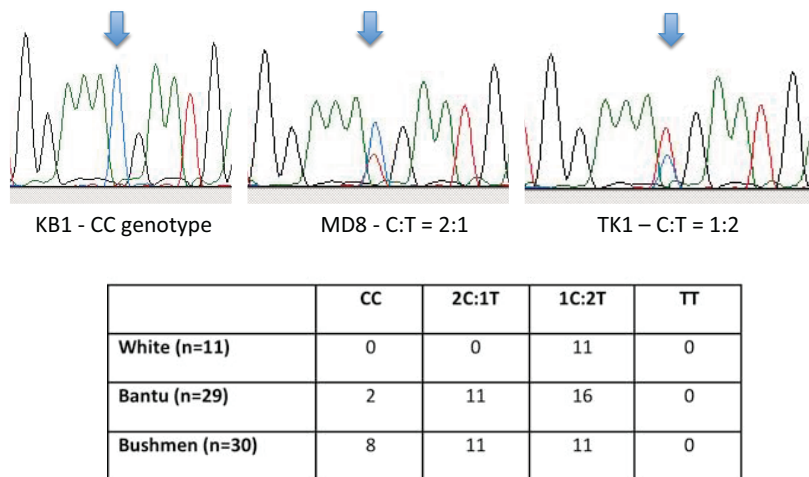

**Supplementary Figure 8B. Sanger-sequencing validation of the *CYP2G* SNP.** Depicting homozygosity of the C-allele in KB1, and uneven allele distribution for MD8 (C:T = 2:1) and TK1 (C:T = 1:2). Further validation of 30 Bushmen, 29 Bantu, and 11 Europeans demonstrated a predominance of C-alleles in the Bushmen and T-alleles in Europeans.

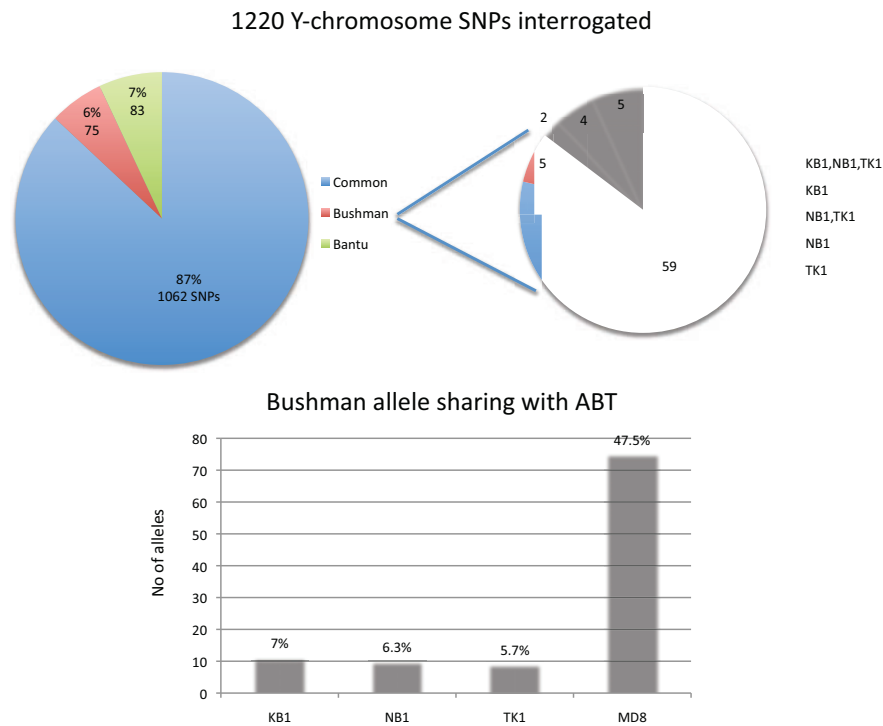

**Supplementary Figure 9. Y-chromosome SNPs.** Schematic overview of 1,220 Y chromosome SNPs genotyped on the Illumina 1M array for the five men, showing the number of shared alleles (1,062 SNPs), Bushmen-specific alleles (75 SNPs) and ABT-unique alleles (83 SNPs). Although 59 alleles are shared by KB1, NB1, and TK1, and a few others are unique to each of them, MD8 has no unique SNPs and shows the greatest Bantu-specific Y-allele sharing with ABT (common ancestral lineage E1b1).

## Full Methods

### Genome-wide genotyping

Whole-genome genotyping was performed using the Infinium HD technology with the current content of the Human 1M-Duo BeadChip, according to the standard protocol provided by the manufacturer (Illumina Inc., San Diego, CA, USA). The BeadChip was imaged with the Illumina BeadArray Reader (BeadStation 500G), and the Illumina BeadStudio software (version 3.2.32) was used for analysis of more than 1 million markers for the five selected individuals (KB1, NB1, TK1, MD8, and ABT), five additional Ju/'hoansi, and one additional Tuu, which were compared to those of a South African European (SAE) and South African Coloured (SAC). A GenCall score value of 0.5 was used as the cutoff to ensure the reliability of genotypes called.

### Mitochondrial sequencing

Whole-genome shotgun libraries were constructed for samples from KB1, NB1, MD8, MD2, KB2, NB8, and ABT. Sufficient sequencing was performed to provide 16- to 134-fold coverage of each complete mitochondrial genome. Mitochondrial reads were identified by mapping to the Cambridge reference mitochondrial sequence, and were subsequently assembled by Newbler.

### Exome sequencing

Large targeted regions can be enriched in a genomic sample using solid-phase programmable microarrays<sup>44,45</sup>. Although solution phase, hybridization selection, and enrichment have been performed using DNA and RNA probes followed by short-read sequencing (<100 bp), this combination of technologies yields low sequencing coverage for the middle of short targeted regions<sup>46</sup>. Currently, there are no reports of efficiently enriching the entire human exome.

Whole human exome sequencing was performed using a combination of Roche NimbleGen and Roche/454 sequencing technologies. An optimized, previously unpublished protocol was employed that efficiently used a total of 5 micrograms of genomic DNA. Previous studies have required 20 micrograms of starting material. A detailed description of the workflow is included below.

The Roche NimbleGen Whole Exome Array targets 175,278 exons covering 26,227,295 bp spanned by 197,218 probe regions covering 34,952,076 bp of the human genome. These exons represent approximately 16,000 protein-coding genes as defined in the Consensus Coding Sequencing (CCDS) project, build 36.2<sup>35</sup>. Chromosomal coordinates for the exon array design were obtained from the UCSC Genome Browser (human build hg18). Additionally, 551 human miRNA genes were targeted in the array and were identified using MiRBase (release 10). A total of 2.1 million probes were incorporated onto the array, targeting the forward strand and using a median probe length of 75 base pairs. Probe design has been previously described<sup>44,45</sup>.

### Sequence capture method

*Protocol optimized for Roche 454 GS FLX Titanium:*

5 µg of input genomic DNA is used to construct a sequencing library, following the protocol in sections 3.1 to 3.9 of the GS FLX *Titanium* General DNA Library Preparation Manual.

5 µg of input DNA is nebulized according to the Library Preparation Method Manual.

Nebulized DNA is purified using two columns from a MinElute PCR Purification kit (QIAGEN) according to the manufacturer's instructions.

Eluted DNA is size-selected using the Double SPRI selection method from the 454 General Library Preparation Method Manual.

Resulting DNA is analyzed using a BioAnalyzer DNA 7500 LabChip to ensure that the mean fragment size is between 500 and 800 bp and less than 10% of the library is below 350 bp or greater than 1,000 bp.

Material passing the above quality control is end-polished, has adaptors ligated, small fragments removed, and then a single-stranded DNA library is recovered using the methods from the Library Preparation Manual.

1  $\mu$ L of the resulting sstDNA library is analyzed on a BioAnalyzer 6000 Pico chip and quality assessed based on Table 3-1 of the General Library Preparation Manual.

- The mean fragment size should be between 500 and 800 bp, and less than 10% of the DNA should be shorter than 350 bp or longer than 1,000 bp. The total yield of the library should be >3 ng, with the adaptor dimer peak less than 5% of the library peak height.

The samples are amplified using the Pre-Capture LM-PCR protocol in the NimbleGen *Titanium* Optimized Sequence Capture User Guide.

Amplified pre-capture LM-PCR material is purified using QIAquick (QIAGEN) columns and a modified protocol.

- 1,250  $\mu$ L (5X) of Qiagen buffer PBI is added to each tube.
- The sample is applied to the QIAquick column and eluted in 50  $\mu$ L of PCR-grade water.

The concentration and size distribution of the amplified library is determined using a BioAnalyzer DNA 7500 chip. Greater than 3  $\mu$ g of DNA should be recovered from the pre-capture LM-PCR, with the same size characteristics given above.

Samples are hybridized and eluted according to the methods described in the NimbleGen *Titanium* Optimized Sequence Capture User Guide.

LM-PCR is done on captured samples according to the methods described in the NimbleGen *Titanium* Optimized Sequence Capture User Guide.

Post-capture LM-PCR material is cleaned up using the modified QIAquick column method indicated above.

1  $\mu$ L of the post-capture LM-PCR is assessed using a BioAnalyzer DNA 7500 chip for the same criteria as above. A NanoDrop spectrophotometer is used to quantify the concentration and the  $A_{260}/A_{280}$  ratio.

qPCR is used to assess the enrichment success according to the methods described in the NimbleGen *Titanium* Optimized Sequence Capture User Guide.

The resulting library concentration is quantified by PicoGreen fluorometry.

Library emulsion PCR is then performed according to the GS FLX Titanium emPCR Preparation Manual, and the remaining workflow is identical to the standard GS FLX Titanium sequencing run.

### Whole-genome sequencing of KB1

We employed previously described protocols<sup>47,48</sup>, which were augmented as follows. Genomic DNA fragments extracted from blood samples of KB1 and NB1 were size-selected before DNA library construction by running the samples on a 2% unstained agarose gel along with a 100 bp DNA ladder (NE Biolabs). The ladder was excised and stained for fragment visualization, and for KB1 and NB1 we excised fragments between 400 and 1000 bp. The samples were then purified using the QIAquick Gel Extraction Kit from Qiagen and used for library construction according to the manufacturer's instructions (Roche Applied Sciences). These samples were sequenced on four Roche/454 GS FLX instruments using Titanium chemistry, for a total of 72 runs.

### Computational methods

This section describes the details of the pipeline to call SNPs for KB1 and other Bushmen genomes from the sequence data produced by the Roche/454 GS-FLX sequencing instrument. The first step was to partition hg18 (the human reference genome used here) into intervals that would be uniquely mappable using reads of length 300 bp or more. The sequenced reads were then mapped to hg18 and assigned to one of the intervals. Newbler was then run on the reads in those intervals, and the SNPs were collected and transferred back to the original hg18 coordinates. After about 8X of the data was mapped, we examined the mapped intervals and discarded intervals that showed indications of pileup. These steps are described in greater detail below.

*Single-coverage regions in hg18.* The “single coverage” regions are intervals of hg18 that we expect sequenced human reads to map to uniquely. These were determined by aligning hg18 to itself with high stringency and finding the leftover intervals — those that did not align to some other part of hg18. Specific alignment details appear below, but we were looking for alignments of 300 bp or longer with at least 97% identity. Many identified repeats are uniquely mappable at this identity level. Further, some recent low copy number segmental duplications are not uniquely mappable at this level, even though they are not annotated as repeats in the human genome.

Approximately 49,000 single-coverage regions were identified. These are the regions between intervals that were parts of an hg18 self-alignment (also excluding regions with long runs of Ns). Lengths ranged from 1.7Mb down to a single base. Note that while short regions seem paradoxical — how can a one-base region be uniquely mappable? — in fact, this means that any 300-base read containing this position should be uniquely mappable.

Note that reads can occasionally map outside of single-coverage regions, as it's still possible for a read to uniquely map within a region where a strong self-alignment exists. This can happen in many ways, which are outside the scope of this document. Since our aim is to place reads into groups to be separately assembled, this is not a problem.

*Self-alignment details.* Lastz, a pairwise aligner that is freely available at



[http://www.bx.psu.edu/miller\\_lab](http://www.bx.psu.edu/miller_lab), was used to perform the self-alignment of hg18, with the goal of identifying all alignments with length  $\geq 300$  bases and identity  $\geq 97\%$ . This proved to be a challenge because of the presence of repeats (and repeats could not be excluded from this analysis). After some experimentation, we settled on a two-stage process using different scoring in each stage. Further, we were able to improve runtime by splitting the genome into 50-Mb chunks.

The first stage identified HSPs (high-scoring segment pairs, i.e., alignments without any gaps) using lastz with the following parameters, then post-processing to discard HSPs shorter than 100 bp. (Please see the lastz documentation for a more thorough explanation of these parameters.)

```
--step=32 --seed=match13 --notransitions --match=1,5 --hsptreshold=85  
--identity=97
```

Soft-masking (marking of repetitive sequences by lower-case letters) was removed from the input sequences so that repeat regions were included in the alignments. A step of 32 was chosen because our target alignment (300 bp, 97% identity) has at least 291 matches and no more than 9 mismatches. Assuming no indels, such an alignment has a probability of less than 1 in 1,000 of failing to contain a 44-base exact match. With

```
--step=32 and --seed=match13 we will find any exact match of length 44 or longer. With  
matches scoring 1 and mismatches -5, our target HSPs (97 matches and 3 mismatches) would  
score 82. However, the threshold of 85 also allows shorter, higher-identity HSPs. These were  
discarded using post-processing (before the second stage).
```

The second stage performs gapped alignment using the HSPs from the first stage. The following lastz parameters were used, with additional post-processing to discard alignments shorter than 300 bp.

```
--match=1,20 --gap=21,20 --ydrop=221 --gappedthreshold=102 --identity=97
```

Soft-masking was also removed in this stage. Here the mismatch scoring is much more stringent than for HSPs, and gap scoring is set to be nearly the same as for mismatches. Ydrop is set so that we will tolerate a run of about 10 mismatches. The target alignment (291 matches and 9 mismatches) would score 111 (the scoring threshold of 102 is thus a little lenient). Note that using these parameters in the first stage would have required an HSP threshold so low that the program would be overwhelmed by low-scoring HSPs.

The self-aligning intervals identified by this process were considered to be indistinguishable regions. They were combined by union, also including any run of 100 or more Ns in hg18. Intervals shorter than 500 bases were discarded, since these could possibly be bridged by a read aligning to the two flanking regions. The complement of the resulting set of intervals is the set of single-coverage intervals discussed in this report. There are 49,179 of these regions, with an average length of 54,821 bases. In total, they cover 2,696,041,061 bases, or 94.3% of the non-N portion of hg18.

### Mapping KB1 reads

Seventy-seven sequencing runs from KB1 were compared to hg18. This was 83,331,226

trimmed reads comprising 29,165,432,509 bases (average length 350). The reads were aligned using lastz, and fall into four classes: mappable (84.5%), aligned but not uniquely mappable (5.4%), not alignable (9.7%), and uninformative (0.5%). (Uninformative reads are duplicates — only one of each group of duplicate reads is processed). The mapped reads comprised 26,100,525,922 bases, which represent 9.1X coverage of hg18 (excluding runs of Ns).

Alignment was performed using lastz with the following parameters:

```
--step=15 --seed=match13 --notransitions --exact=18 --maxwordcount=6 \  
--match=1,3 --gap=1,3 --ydrop=10 --gappedthreshold=18 --identity=97 --coverage=90 \  
--ambiguousn
```

Soft-masking was removed, allowing reads to align to repeats. A word-count limit of 6 corresponded to removing roughly 10% of the seed-word positions from last's internal table. Mapping was then performed by collecting any alignments for a given read. A read with only a single alignment, with identity  $\geq 98\%$ , was considered mappable. A read with more than one alignment, but with one having identity  $\geq 98\%$  and at least 1.5% better than the second best, was also considered mappable. There is a minor mistake here, in that any alignments with identity  $< 97\%$  were discarded during the alignment stage. So it is possible that a read might have, say, one alignment at 98% and another at 96.6%, which should not pass the mappability criteria but which slips through as “mappable”.

### Calling KB1 SNPs from the whole-genome data

Each single-coverage interval was assigned a segment of the human reference sequence, consisting of the interval itself plus an additional 500 bp on each side to handle reads mapping at the ends of the single-coverage interval. The reads mapping to that segment were collected and the information about them extracted from the original SFF files. This included the complete untrimmed sequence, the quality values, and the flowgram information. This data was then combined to form an input SFF file, and supplied to Newbler as input. The SNP calls made by Newbler were then transferred to their original hg18 coordinates and then filtered to call SNPs only in the regions where we did not observe a pileup of reads.

### Newbler details

This section describes the algorithm used by Newbler to call SNPs. The larger set of SNPs is called the AllDiffs set and it attempts to enumerate all the differences between the reference and the reads using less stringent filters and thresholds. For a SNP to be identified and reported, there must be at least two non-duplicate reads that (1) show the difference, (2) have at least 5 bases on both sides of the difference, and (3) have at most a few other isolated sequence differences in the read. In addition, if the `-e` option is used to set an expected depth, there must be at least 5% of that depth in differing reads. Finally, for single-base overcalls or undercalls to be reported, they must have a flow signal distribution that differs from that of the reads matching the reference (i.e., not all overcalls and undercalls are reported as SNPs). Once the SNP is identified, all reads that fully span the difference location and have at least 5 additional flanking nucleotides on both sides are used in reporting it.

Newbler designates a subset of these calls as High Confidence calls (HCDiffs). The general rules for this subset are:

- 1) There must be at least 3 non-duplicate reads containing the non-reference nucleotide, unless the `-e` option is specified, in which case at least 10% of the expected depth must contain it.
- 2) There must be both forward and reverse reads showing the difference, unless there are at least 5 reads with quality scores over 20 (or 30 if the difference involves a 5-mer or higher).
- 3) If the difference is a single-base overcall or undercall, the reads with the non-reference nucleotide must form the consensus of the sequenced reads (i.e., at that location, the overall consensus must differ from the reference) and the signal distribution of the differing reads must vary from the matching reads (and the number of bases in that homopolymer of the reference).

### **Heterozygous vs. homozygous**

SNP calls for KB1, NB1, MD8, TK1, and ABT were made from 454 data. We use a simple metric, AAF (alternate allele frequency), to call a SNP heterozygous vs. homozygous. For all of these samples, the SNP was called homozygous if the alternate allele frequency was greater than or equal to 80%.

### **Adding exome-capture sequences to the whole-genome data for KB1**

We compared the SNP calls from the whole-genome fragment (non-paired-end) sequences to those from the exome-captured sequences, in order to validate the sequences and their subsequent analyses. For KB1, we called 3,536,132 SNPs using 9.13X whole-genome fragment sequences, and 122,392 SNPs using 16-fold exome sequences. 99,372 of the locations were common between the two sets of SNP calls. The difference was largely related to the heterozygosity of the location. We found that in some cases one set included a homozygous call, whereas the other set included a heterozygous call, and this was usually due to read coverage at the location.

### **Using Illumina to validate the KB1 SNP calls**

We used 23.2-fold mapped Illumina whole-genome data to verify the 454 SNP calls. We used MAQ with default parameters to call a liberal set of SNPs from the data. We also called a high-confidence subset using single-end mapping quality scores and discarding abnormal pairs. We required that a read have a minimum mapping quality of 10, the SNP location have a read depth between 6 and 75, and the SNPs not be within 10 bp of an indel. Furthermore, we filtered to keep only SNPs in regions that we deemed mappable using the 454 reads. We called 4,215,263 liberal and 3,835,844 high-confidence SNPs from the Illumina data. 2,943,320 of the 3,594,898 SNP calls made using 454 sequences were confirmed using those made from the Illumina sequences. Further analysis showed that lack of coverage was the major reason for the discrepancies between the calls from the two technologies. This was also the primary reason that we decided to pool the 454 and Illumina SNP calls to create a single final set of SNPs for KB1.

### **Using genotyping data to validate the KB1 SNP calls**

We used the forward strand output from BeadStudio and the actual strand of the alleles from dbSNP to infer the genotypes on the genome-wide array. We filtered the genotype information to remove indels, and sorted it into two separate sets: one for locations with reference sequence matches and the other for the SNP calls. Then, we computed two separate intersections, using

only the positions of the sequence SNPs intersecting the genotype SNPs and the sequence SNPs intersecting the reference sequence matches. We computed the false-negative rate (0.09) by taking the number of genotype SNP calls that were missed (not called) by the sequencing and dividing this by the total number of genotype SNPs. The false-positive rate (0.0009) was calculated by taking the number of sequence SNPs intersecting the reference sequence matches divided by the number of reference sequence matches.

### The final set of KB1 SNP calls

The following rules were used to pool the SNP calls to form the final set of KB1 SNPs.

- 1) All SNPs from the genotyping array were included.
- 2) A high-confidence SNP call from 454 sequence data was *not* included in the final set, if any of the following was found to be true:
  1. If the 454 call was a homozygous SNP and there was no evidence supporting the variant allele in the uniquely mapped Illumina reads. This rule was only applied to regions with more than 3 uniquely mapped Illumina reads.
  2. If the 454 call was a heterozygous SNP and there was no evidence supporting the variant allele in the uniquely mapped Illumina reads. Only regions with an Illumina coverage of 10 or greater were considered for this rule.
- 3) A high-confidence SNP call using the Illumina data was *not* included in the final set, if any of the following was found to be true:
  1. If the Illumina call was a homozygous SNP, coverage by 454 reads at that location was greater than 3, and it was not called a SNP using 454 data.
  2. If the Illumina call was a heterozygous SNP, coverage by 454 reads at that location was 10 or greater, and it was not called a SNP using 454 data.
- 4) A SNP was included if it was called in the liberal SNP set using both 454 and Illumina sequences.
- 5) All SNPs at locations with more than two alleles were discarded.

These rules were used to decide the locations that would be included in the final set of SNPs.

The genotype calls for the final set were made using the following rules:

- 1) If the location was present on the genome-wide array, the genotype call from the array was selected.
- 2) If the location was not present on the genome-wide array, the genotype call for the technology with the higher coverage was selected. If the number of reads from 454 exceeded the number of reads from Illumina at that location, the 454 call was accepted as the consensus, and vice-versa.

### Whole-genome SOLiD sequencing of ABT

The genome of ABT was sequenced to over 30-fold coverage using Applied Biosystems' short-read technology, SOLiD, including 50-base paired-ends of various insert lengths (2,713,797,283 50-base fragments; 120,825,147 25-base paired reads; 567,425,404 50-base paired reads).

Genomic libraries were constructed from blood-extracted DNA with an average insert size of 3-5

kb. A total of 4,379,849 SNPs were called using the SOLiD System Software for primary and secondary analysis. Further filtering reduced the number of SNP calls to 3,624,334.

### **Whole-genome Illumina sequencing of ABT**

We used 7.2-fold mapped Illumina data to verify the SOLiD SNP calls. Mapping and SNP calling were performed as described above. We called 2,894,707 liberal and 2,040,551 high-confidence SNPs from the Illumina data. 2,366,494 of the 3,624,334 SNP calls made using SOLiD sequences were confirmed using those made from the Illumina sequences. As with KB1, lack of coverage was the major reason for the discrepancies between the calls from the two technologies.

### **Large-insert paired-end sequencing of KB1**

Sixteen runs on the Roche/454 GS FLX platform were performed on large-insert paired-end libraries. A total of 18.8 million reads and 6.4Gb were sequenced. 3.4% of the reads were discarded as uninformative (i.e., an exact duplicate of another read; only one read per group of duplicates was kept for coverage calculations). The number of duplicate reads varied from less than 1% to 15% per run.

About one quarter (26.4%) of the reads did not have the linker present that separates the two ends. In 12.2% of all cases the linker region was too close to one end (less than 18 bp) or had a double linker (the latter in only about 0.1%). The remaining 61.3% were used for assembling the data, computing clone coverage, and detecting copy-number variations. Our in-house mapping algorithm (lastz) was able to map 37% more of the reads to the human reference assembly than the Newbler software from the manufacturer.

An additional 5% of the reads were then filtered out due to their extreme predicted insert size, either too short or too long (the shortest and longest 2.5% of the insert lengths). In total, 43.5% of the paired ends were successfully mapped and kept. The average insert length was determined to be 10.6 kb. The inserts covered 86.6 Gb (clone coverage), which is 30.9 times the number of bases sequenced (mappable genome size is 2.8 Gb). Insert sizes from a total of 19 different libraries were consistent with the following three distinct profiles: Eight runs had insert size distribution of 12 kb average, 8 kb min, 18 kb max. Six runs had had 10 Kb average with 7K min and 15K max insert size, while two other runs had a 7 kb average with 5kb min and 13kb max.

### Personal genomes used in this study but sequenced elsewhere

| Genome                                                                                   | Sequence Method; Project               |                                                                                                                                                                                                                                                                                                                       |
|------------------------------------------------------------------------------------------|----------------------------------------|-----------------------------------------------------------------------------------------------------------------------------------------------------------------------------------------------------------------------------------------------------------------------------------------------------------------------|
| Craig Venter (JCVI) <sup>49</sup>                                                        | Sanger                                 | Dr. Venter's single-base variants from the file HuRef.InternalHuRef-NCBI.gff, filtered to include only "method 1" variants (i.e., where the variant was kept in its original form and not post-processed), and to exclude any variants that had N as an allele. The J. Craig Venter Institute hosts a genome browser. |
| James Watson (CSHL) <sup>13</sup>                                                        | Roche/454 (FLX)                        | These single-base variants came from the file watson_snp.gff.gz. Cold Spring Harbor Lab hosts a genome browser.                                                                                                                                                                                                       |
| Yoruba NA18507 <sup>41</sup>                                                             | Illumina/Solexa                        | Illumina released the read sequences to the NCBI Short Read Archive. Aakrosh Ratan (see author list) mapped the sequence reads to the human reference assembly and called single-base variants using MAQ.                                                                                                             |
| YH (Han Chinese) <sup>50</sup>                                                           | YanHuang Project                       | The YanHuang Project released these single-base variants from the genome of a Han Chinese individual. The data are available from the YH database in the file yhsnp_add.gff. The YanHuang Project hosts a genome browser.                                                                                             |
| SJK (Seong-Jin Kim; Korean) <sup>51</sup>                                                | Illumina                               | Researchers at Gachon University of Medicine and Science (GUMS) and the Korean Bioinformation Center (KOBIC) released these single-base variants from the genome of Seong-Jin Kim. The data are available from KOBIC in the file KOREF-solexa-snp-X30_Q40d4D100.gff.                                                  |
| NA12891 (CEU Trio Father), NA12892 (CEU Trio Mother), NA19240 (Yoruba YRI Trio Daughter) | The 1000 Genomes Project (unpublished) |                                                                                                                                                                                                                                                                                                                       |

### Novel SNPs

A SNP is normally labeled "novel" if it has not previously been published. To determine which SNPs were novel in the genomes sequenced elsewhere, we had to account for the subsequent addition of those SNPs to collective databases. Therefore we used dbSNP version 126, which pre-dates the personal genomes, instead of a more recent dbSNP release. We then treated all of the personal genomes sequenced elsewhere as if each had been published after the others. Thus, in this study, "novel" means that the SNP is not in dbSNP126, any of the other personal genomes listed in the table above, PhenCode<sup>52</sup>, the Environmental Genome Project<sup>53</sup>, or ENCODE<sup>54</sup> resequencing. In the case of indels, any overlap with a polymorphic site called in the other data sources led to its characterization as *not* being novel. For instance, a 10-bp deletion not seen in any other genome but overlapping a single nucleotide change in some individual makes does not qualify as novel. Similarly, for substitutions a new allele at a previously-known SNP location does not count as novel either.

### Figure 3A and the chromosome 17 hotspot

For the genome-wide SNP rates in the KB1 and ABT genomes, SNPs in each (tiled) 50-kb window were counted, including those from six genomes obtained from other sources. The counts for KB1 and ABT were divided by the average count for the other six to obtain a ratio of over-enrichment for each window. Those ratios are plotted in Supplementary Figure 4.

For Figure 3A in the main paper we proceeded as follows. In non-overlapping 50-kb windows across the autosomes, we determined the average number of KB1 SNPs per kilobase of single-copy sequence (see above). We noted an unusually high frequency of SNPs in a 15-window (750-kb) interval of chromosome 17, at positions 41,000,000-41,750,000 in the coordinates of NCBI Build 36. Although nearby regions on both flanks contain near-identical segmental duplications, the interval itself is essentially free of such duplications in both Build 36

and KB1.

To measure the statistical significance of this hotspot, we performed the following randomization experiment. We ranked the autosomal windows by decreasing SNP rate, discarding windows having less than 10 kb of single-copy sequence. A collection of windows with the same SNP rate were re-ranked so that each was given the average of their original ranks. Of the 52,341 remaining windows, those in the putative hotspot had ranks 410, 9780, 178, 347, 7740, 151, 164, 230, 398, 792, 631, 702, 1007, 3378, and 152, whose sum is 26,060. Starting with the list of ranks (after re-ranking to handle identical SNP rates), we performed 100,000 randomizations of the list (using the so-called Fisher-Yates shuffle), and, in each case, determined whether any 15 consecutive numbers (of the 52,341 shuffled ranks) had a sum of 26,060 or less. That condition was never met in the 100,000 simulated events, giving an empirical  $p$ -value of less than  $10^{-5}$ .

To enable direct comparison of SNP rates from several genomes, we computed the autosome-wide average number of SNPs per single-copy kilobase for each genome. That is, we computed the total number of SNPs in single-copy regions (of NCBI Build 36) and divided by the number of single-copy kilobases (2,584,574). The resulting numbers are as follows:

|              |        |
|--------------|--------|
| KB1          | 0.9256 |
| NB1          | 0.1312 |
| ABT          | 1.3043 |
| NA18507      | 0.9892 |
| NA19240      | 1.3329 |
| Watson       | 0.7706 |
| Venter       | 1.1208 |
| YH (Chinese) | 1.1519 |
| SJK (Korean) | 1.2841 |

In the region of chromosome 17 pictured in Fig. 3A, we determined SNPs per single-copy kilobase, then divided by that genome's autosome-wide average.

### Predicting which amino-acid changes may have functional consequences

Amino-acid changes are more likely to be deleterious if they occur in a functional site and<sup>55</sup> substitute an amino acid with different biochemical properties from the original. Several computational tools use this principle to predict which protein polymorphisms are likely to be detrimental. Another useful computational resource is MODBASE<sup>56</sup>, a database providing information about protein structure models, which help in predicting the structurally and functionally important sites of a protein sequence. Here, we describe a pipeline that we use to identify putative deleterious SNPs.

First, we use an in-house program named ModelFinder to identify putative functional SNPs by using protein structure model information (also used in ref 48). Our assumption is that SNPs within a modeled sequence have a higher likelihood of being deleterious, because the 3D structure provides the protein with a particular functionality. ModelFinder uses amino-acid sequence and SNP information as the input, locating the protein information for each SNP by using the UCSC annotation database<sup>57</sup>, and querying MODBASE to determine if the residue is covered by a model structure. The model score and sequence identity with the model template for the covered SNPs are also obtained. In addition, the phastCons<sup>58</sup> score and Blosum62<sup>59</sup> score are obtained for these SNP sites, to measure the conservation level among 44 species and various protein families. The residues with high conservation levels are expected to be more important functionally. Subsequently, another program attempts to map these potentially deleterious SNPs

to known disease-associated genes in the OMIM database. We combine these sources of information to predict which observed amino-acid-changing SNPs are likely to have a functional consequence. The following table indicates how many of the amino-acid-changing SNPs in each of our five participants scored using these criteria.

|     | # of novel SNPs | # of putative functional SNPs |                 | # of putative functional SNPs with phastCons>0.8 |                    | # of putative functional SNPs involved in OMIM genes |                    |
|-----|-----------------|-------------------------------|-----------------|--------------------------------------------------|--------------------|------------------------------------------------------|--------------------|
|     |                 | #                             | % in novel SNPs | #                                                | % in putative SNPs | #                                                    | % in putative SNPs |
| ABT | 2923            | 851                           | 29.11%          | 664                                              | 78.03%             | 519                                                  | 60.99%             |
| MD8 | 2559            | 705                           | 27.55%          | 503                                              | 71.38%             | 456                                                  | 64.68%             |
| KB1 | 3592            | 912                           | 25.39%          | 660                                              | 72.37%             | 565                                                  | 61.95%             |
| NB1 | 3096            | 828                           | 26.74%          | 560                                              | 67.63%             | 502                                                  | 60.63%             |
| TK1 | 3116            | 865                           | 27.76%          | 660                                              | 76.3%              | 546                                                  | 63.12%             |

### Validating predicted duplications

Genomic DNA fragments from KB1 and NA18507 were labeled and hybridized against a NimbleGen genome-wide tiling microarray (2.1 million HD2). We also designed a custom array (12-plex, 135,000) targeted toward regions of predicted copy-number difference. On the targeted array, the probe intensities from a pair of reverse-labeling experiments were averaged together. Targeted analysis was performed for each predicted interval greater than 20 kb. The mean log<sub>2</sub> intensities for each interval were compared with the signals from a set of control regions using a single-tailed unequal-variance t-test. Validation status was determined using a false discovery rate threshold of 0.01<sup>60</sup>.



## Supplementary References

- 1 Westphal, E. O. J., in *Current trends in linguistics* (Mouton, The Hague, 1971), Vol. 7,  
pp. 367.
- 2 Smith, A., Malherbe, C., Guenther, M. & Berens, P., *The Bushmen of Southern Africa: a  
foraging society in transition*. (David Philip Publishers, Cape Town, 2004).
- 3 Oota, H. et al., Human mtDNA and Y-chromosome variation is correlated with matrilineal  
versus patrilineal residence. *Nat Genet* **29** (1), 20 (2001).
- 4 Karafet, T. M. et al., New binary polymorphisms reshape and increase resolution of the  
human Y chromosomal haplogroup tree. *Genome Res* **18** (5), 830 (2008).
- 5 Cruciani, F. et al., A back migration from Asia to sub-Saharan Africa is supported by  
high-resolution analysis of human Y-chromosome haplotypes. *Am J Hum Genet* **70** (5),  
1197 (2002).
- 6 Working Group of Indigenous Minorities in Southern Africa, WIMSA, Available at  
<http://www.wimsanet.org/news>, (2009).
- 7 Patterson, N. et al., Genetic structure of a unique admixed population: implications for  
medical research. *Hum Mol Genet* (2009).
- 8 Berniell-Lee, G. et al., Admixture and sexual bias in the population settlement of La  
Reunion Island (Indian Ocean). *Am J Phys Anthropol* **136** (1), 100 (2008).
- 9 Coelho, M. et al., On the edge of Bantu expansions: mtDNA, Y chromosome and lactase  
persistence genetic variation in southwestern Angola. *BMC Evol Biol* **9**, 80 (2009).
- 10 Pilkington, M. M. et al., Contrasting signatures of population growth for mitochondrial  
DNA and Y chromosomes among human populations in Africa. *Mol Biol Evol* **25** (3),  
517 (2008).
- 11 Pearson, C. E., Nichol Edamura, K., and Cleary, J. D., Repeat instability: mechanisms of  
dynamic mutations. *Nat Rev Genet* **6** (10), 729 (2005).
- 12 Garber, M. et al., Closing gaps in the human genome using sequencing by synthesis.  
*Genome Biol* **10** (6), R60 (2009).
- 13 Wheeler, D. A. et al., The complete genome of an individual by massively parallel DNA  
sequencing. *Nature* **452** (7189), 872 (2008).
- 14 Ingram, C. J. et al., Lactose digestion and the evolutionary genetics of lactase persistence.  
*Hum Genet* **124** (6), 579 (2009).
- 15 Han, J. et al., A genome-wide association study identifies novel alleles associated with  
hair color and skin pigmentation. *PLoS Genet* **4** (5), e1000074 (2008).
- 16 Nalls, M. A. et al., Admixture mapping of white cell count: genetic locus responsible for  
lower white blood cell count in the Health ABC and Jackson Heart studies. *Am J Hum  
Genet* **82** (1), 81 (2008).
- 17 Reich, D. et al., Reduced neutrophil count in people of African descent is due to a  
regulatory variant in the Duffy antigen receptor for chemokines gene. *PLoS Genet* **5** (1),  
e1000360 (2009).
- 18 Miller, L. H., Mason, S. J., Clyde, D. F., and McGinniss, M. H., The resistance factor to  
*Plasmodium vivax* in blacks. The Duffy-blood-group genotype, FyFy. *N Engl J Med* **295**  
(6), 302 (1976).
- 19 He, W. et al., Duffy antigen receptor for chemokines mediates trans-infection of HIV-1  
from red blood cells to target cells and affects HIV-AIDS susceptibility. *Cell Host  
Microbe* **4** (1), 52 (2008).

- 20 Langhi, D. M., Jr. and Bordin, J. O., Duffy blood group and malaria. *Hematology* **11** (5),  
389 (2006).
- 21 Escalante, A. A. et al., A monkey's tale: the origin of Plasmodium vivax as a human  
malaria parasite. *Proc Natl Acad Sci U S A* **102** (6), 1980 (2005).
- 22 Sheng, J. et al., Characterization of human CYP2G genes: widespread loss-of-function  
mutations and genetic polymorphism. *Pharmacogenetics* **10** (8), 667 (2000).
- 23 Itsara, A. et al., Population analysis of large copy number variants and hotspots of human  
genetic disease. *Am J Hum Genet* **84** (2), 148 (2009).
- 24 Hoeg, J. M., Demosky, S. J., Jr., Pescovitz, O. H., and Brewer, H. B., Jr., Cholesteryl  
ester storage disease and Wolman disease: phenotypic variants of lysosomal acid  
cholesteryl ester hydrolase deficiency. *Am J Hum Genet* **36** (6), 1190 (1984).
- 25 Zschenker, O. et al., Characterization of lysosomal acid lipase mutations in the signal  
peptide and mature polypeptide region causing Wolman disease. *J Lipid Res* **42** (7), 1033  
(2001).
- 26 Wiebusch, H. et al., A novel missense mutation (Gly2Arg) in the human lysosomal acid  
lipase gene is found in individuals with and without cholesterol ester storage disease  
(CESD). *Clin Genet* **50** (2), 106 (1996).
- 27 Lalueza-Fox, C. et al., Bitter taste perception in Neanderthals through the analysis of the  
TAS2R38 gene. *Biol Lett* (2009).
- 28 Wooding, S. et al., Independent evolution of bitter-taste sensitivity in humans and  
chimpanzees. *Nature* **440** (7086), 930 (2006).
- 29 Dickson, R. C., The normal hearing of Bantu and Bushmen. A pilot study. *J Laryngol*  
*Otol* **82** (6), 505 (1968).
- 30 Jarvis, J. F. and Van Heerden, H. G., The acuity of hearing in the Kalahari Bushmen . A  
pilot survey. *J Laryngol Otol* **81** (1), 63 (1967).
- 31 Bork, J. M. et al., Usher syndrome 1D and nonsyndromic autosomal recessive deafness  
DFNB12 are caused by allelic mutations of the novel cadherin-like gene CDH23. *Am J*  
*Hum Genet* **68** (1), 26 (2001).
- 32 Eudy, J. D. et al., Mutation of a gene encoding a protein with extracellular matrix motifs  
in Usher syndrome type IIa. *Science* **280** (5370), 1753 (1998).
- 33 Wood, E. T. et al., Contrasting patterns of Y chromosome and mtDNA variation in  
Africa: evidence for sex-biased demographic processes. *Eur J Hum Genet* **13** (7), 867  
(2005).
- 34 International Society of Genealogy Y-DNA Haplogroup Tree, Available at  
<http://www.isogg.org/tree/index09.html>, (2009).
- 35 Pruitt, K. D. et al., The consensus coding sequence (CCDS) project: Identifying a  
common protein-coding gene set for the human and mouse genomes. *Genome Res* **19** (7),  
1316 (2009).
- 36 McDougall, I., Brown, F. H., and Fleagle, J. G., Stratigraphic placement and age of  
modern humans from Kibish, Ethiopia. *Nature* **433** (7027), 733 (2005).
- 37 Noonan, J. P. et al., Sequencing and analysis of Neanderthal genomic DNA. *Science* **314**  
(5802), 1113 (2006).
- 38 Gonder, M. K. et al., Whole-mtDNA genome sequence analysis of ancient African  
lineages. *Mol Biol Evol* **24** (3), 757 (2007).
- 39 Green, R. E. et al., A complete Neanderthal mitochondrial genome sequence determined  
by high-throughput sequencing. *Cell* **134** (3), 416 (2008).

- 40 Briggs, A. W. et al., Targeted retrieval and analysis of five Neandertal mtDNA genomes. *Science* **325** (5938), 318 (2009).
- 41 Bentley, D. R. et al., Accurate whole human genome sequencing using reversible terminator chemistry. *Nature* **456** (7218), 53 (2008).
- 42 Salas, A. et al., The making of the African mtDNA landscape. *Am J Hum Genet* **71** (5), 1082 (2002).
- 43 Caswell, J. L. et al., Analysis of chimpanzee history based on genome sequence alignments. *PLoS Genet* **4** (4), e1000057 (2008).
- 44 Albert, T. J. et al., Direct selection of human genomic loci by microarray hybridization. *Nat Methods* **4** (11), 903 (2007).
- 45 Okou, D. T. et al., Microarray-based genomic selection for high-throughput resequencing. *Nat Methods* **4** (11), 907 (2007).
- 46 Herman, D. S. et al., Filter-based hybridization capture of subgenomes enables resequencing and copy-number detection. *Nat Methods* **6** (7), 507 (2009).
- 47 Margulies, M. et al., Genome sequencing in microfabricated high-density picolitre reactors. *Nature* **437** (7057), 376 (2005).
- 48 Miller, W. et al., Sequencing the nuclear genome of the extinct woolly mammoth. *Nature* **456** (7220), 387 (2008).
- 49 Levy, S. et al., The diploid genome sequence of an individual human. *PLoS Biol* **5** (10), e254 (2007).
- 50 Wang, J. et al., The diploid genome sequence of an Asian individual. *Nature* **456** (7218), 60 (2008).
- 51 Ahn, S. M. et al., The first Korean genome sequence and analysis: full genome sequencing for a socio-ethnic group. *Genome Res* **19** (9), 1622 (2009).
- 52 Giardine, B. et al., PhenCode: connecting ENCODE data with mutations and phenotype. *Hum Mutat* **28** (6), 554 (2007).
- 53 National Institute of Environmental Health Sciences' Environmental Genome Project, Available at <http://egp.gs.washington.edu>, (2009).
- 54 International HapMap Project: ENCODE Data, Available at <http://www.hapmap.org/downloads/encode1.html.en#Reseq>, (2009).
- 55 Sunyaev, S., Ramensky, V., and Bork, P., Towards a structural basis of human non-synonymous single nucleotide polymorphisms. *Trends Genet* **16** (5), 198 (2000).
- 56 Pieper, U. et al., MODBASE: a database of annotated comparative protein structure models and associated resources. *Nucleic Acids Res* **34** (Database issue), D291 (2006).
- 57 Kuhn, R. M. et al., The UCSC genome browser database: update 2007. *Nucleic Acids Res* **35** (Database issue), D668 (2007).
- 58 Siepel, A. et al., Evolutionarily conserved elements in vertebrate, insect, worm, and yeast genomes. *Genome Res* **15** (8), 1034 (2005).
- 59 Henikoff, S. and Henikoff, J. G., Amino acid substitution matrices from protein blocks. *Proc Natl Acad Sci U S A* **89** (22), 10915 (1992).
- 60 Storey, J. D. and Tibshirani, R., Statistical significance for genomewide studies. *Proc Natl Acad Sci U S A* **100** (16), 9440 (2003).
